# Supplementary figures and images for: Gas–liquid flow synthesis of Zn3N2-quantum dots
Source: Royal Society of Chemistry journal article supplement (doi:10.1039/d4re00548a), 2025-01-01

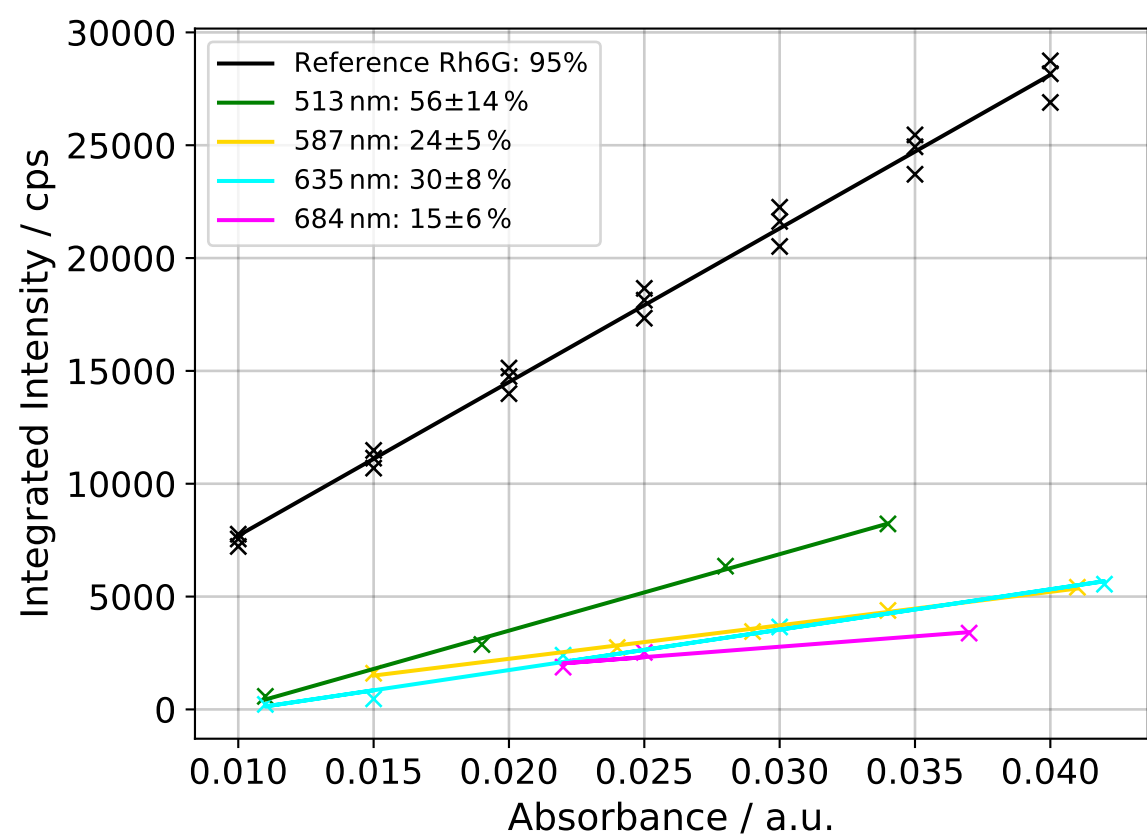

Supplement: d4re00548a1.zip [file d4re00548a1.zip]

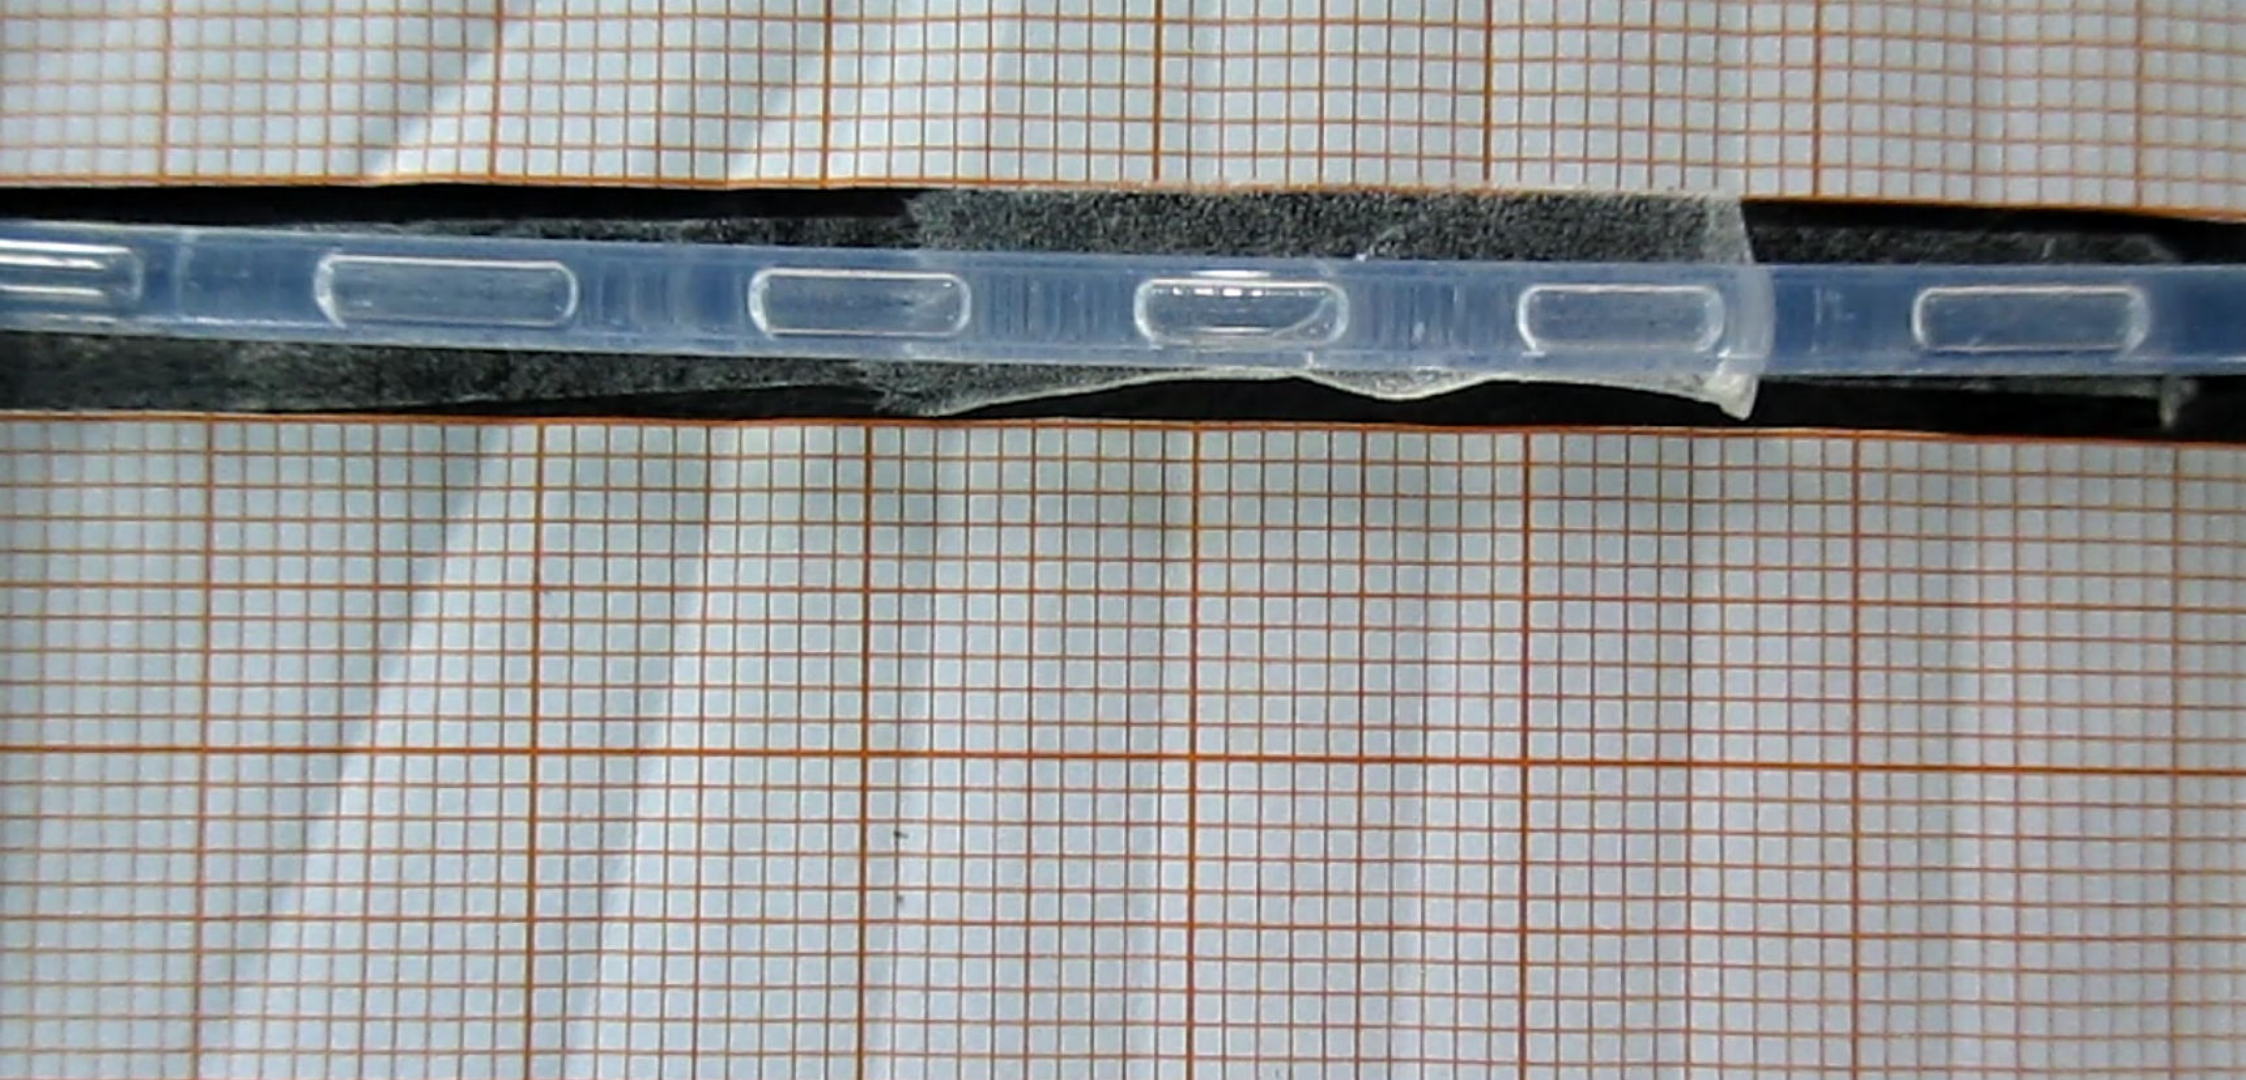

Supplement: d4re00548a1.zip [file d4re00548a1.zip]

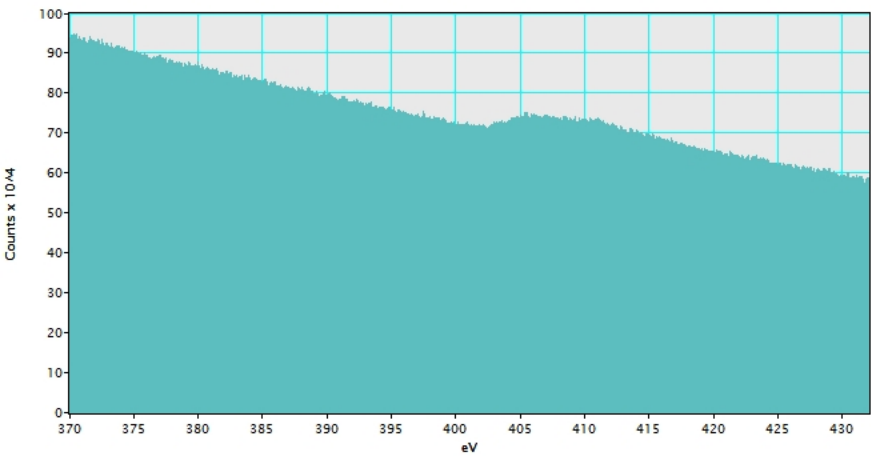

Supplement: d4re00548a1.zip [file d4re00548a1.zip]

# 1-Octadecene, Atmosphere

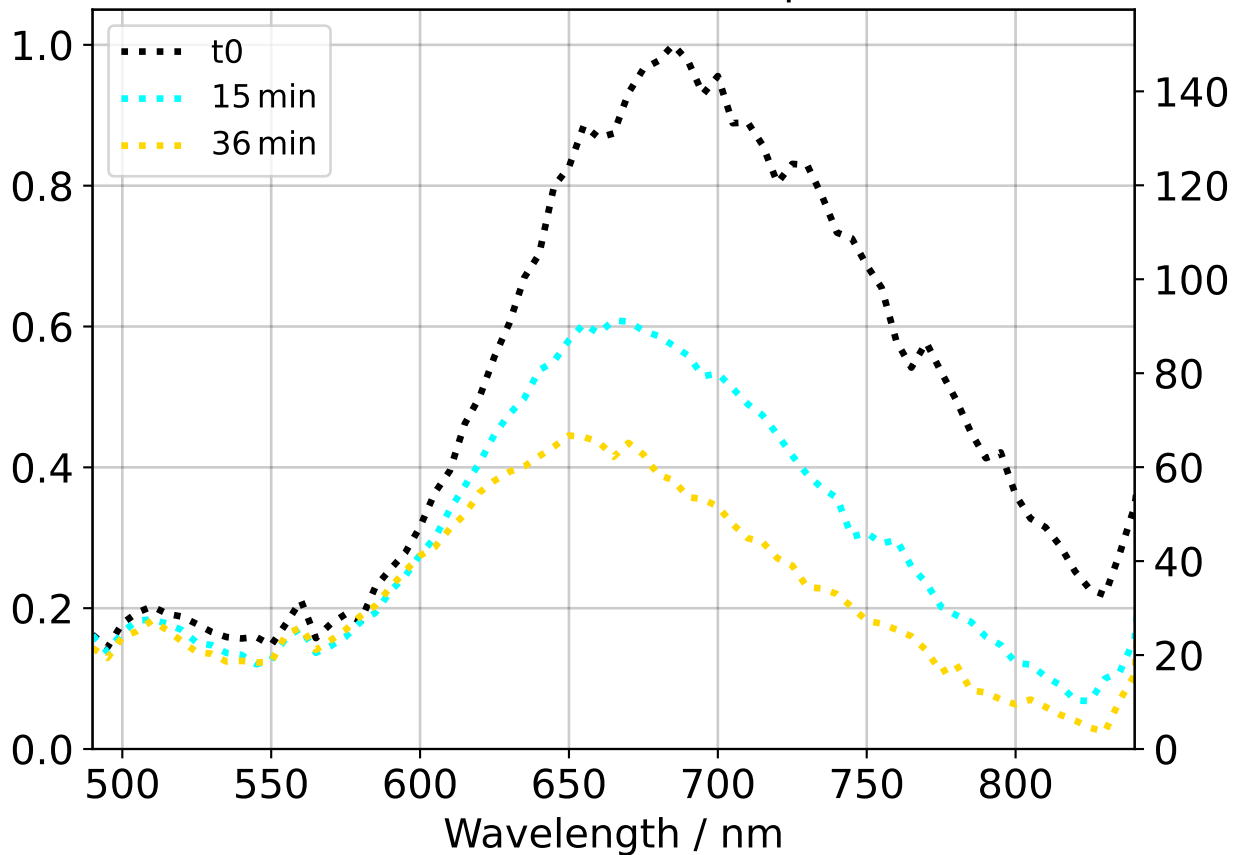

Supplement: d4re00548a1.zip [file d4re00548a1.zip]

Normalised Intensity

1.0  
0.8  
0.6  
0.4  
0.2  
0.0

500

550

600

650

700

750

800

Wavelength / nm

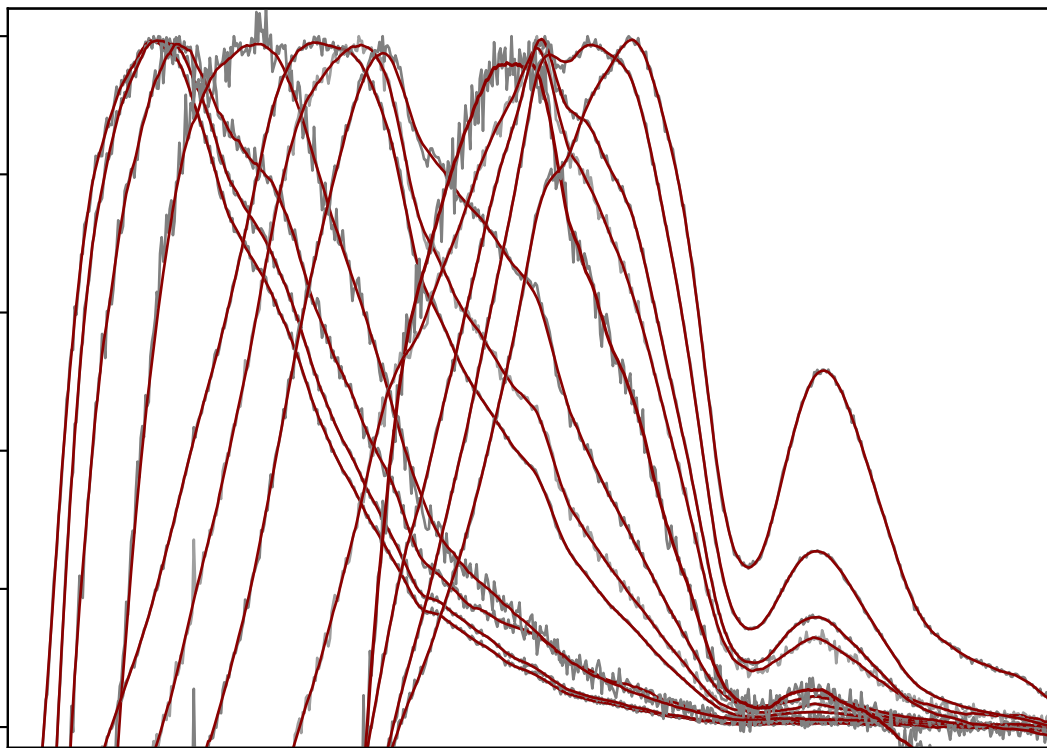

Supplement: d4re00548a1.zip [file d4re00548a1.zip]

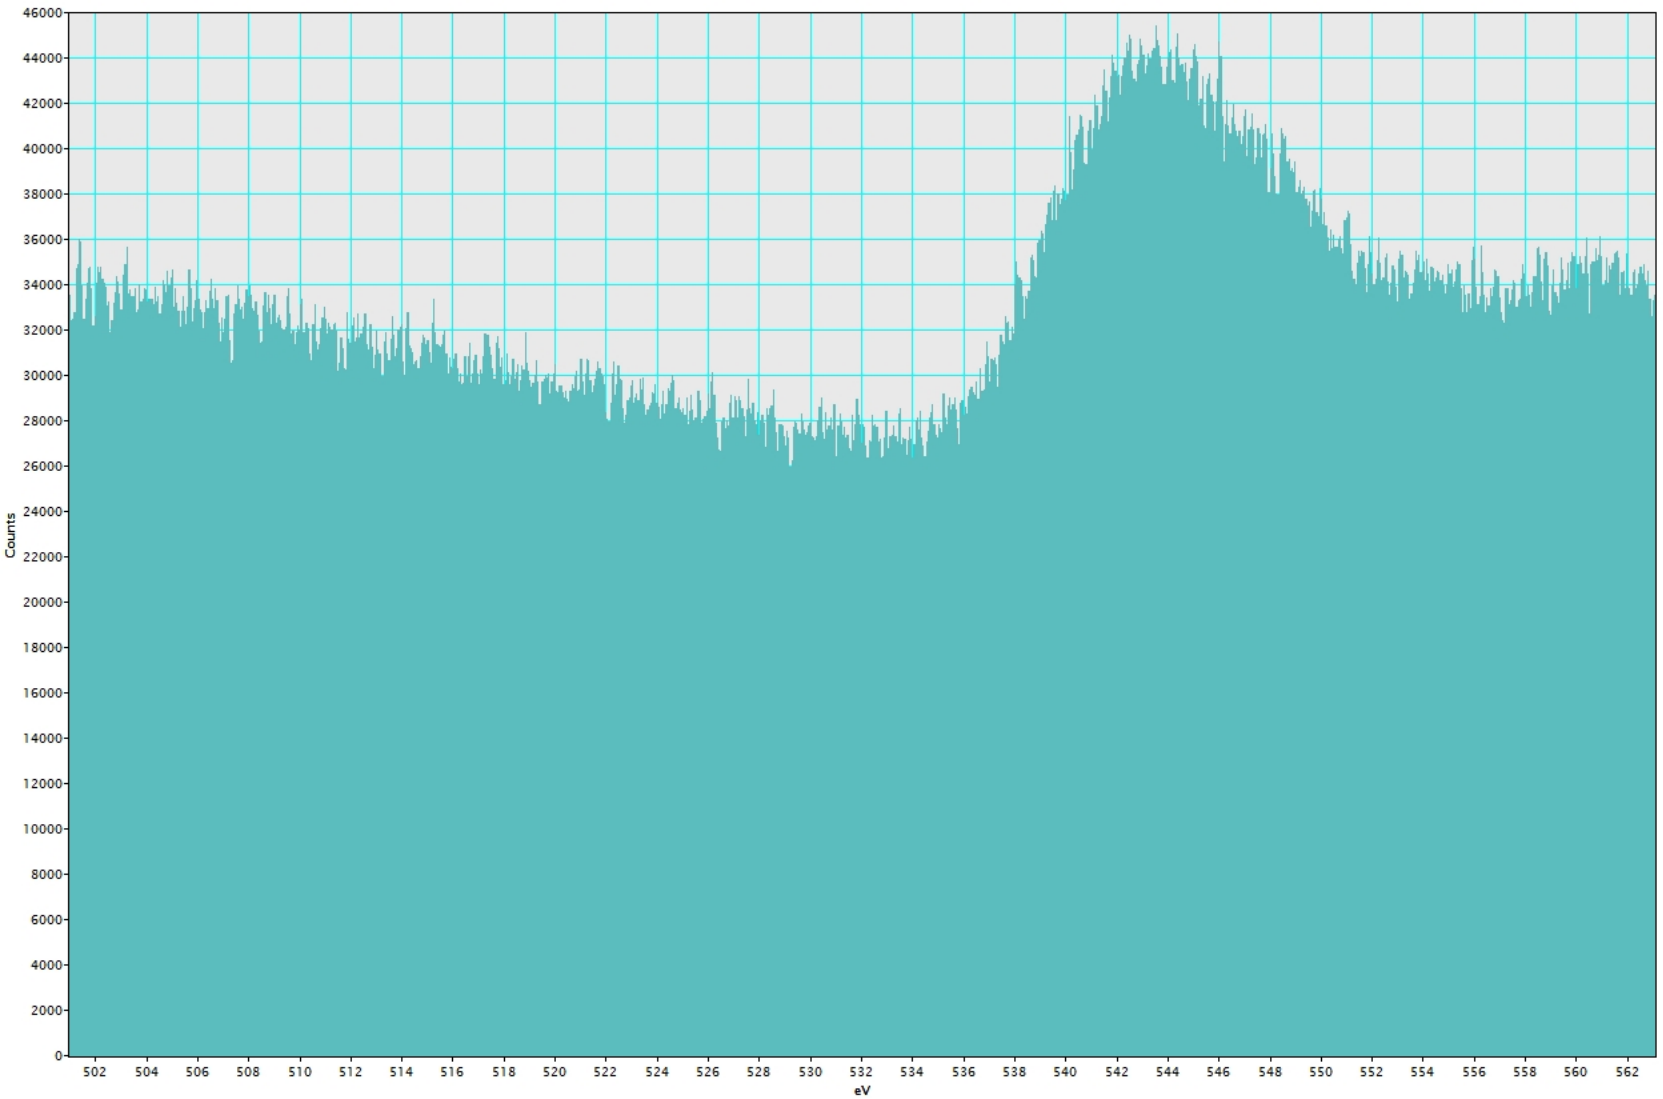

Supplement: d4re00548a1.zip [file d4re00548a1.zip]

# 1-Octadecene, Inertgas

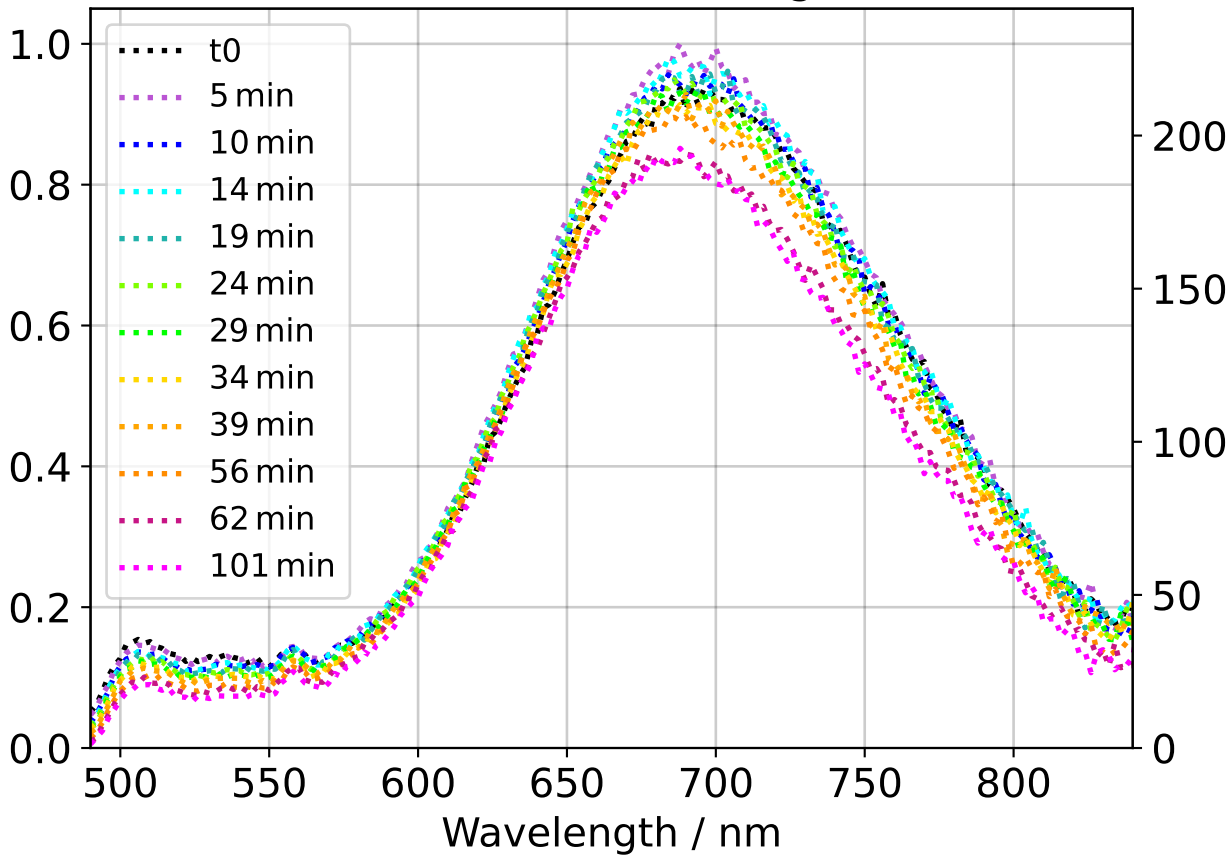

Supplement: d4re00548a1.zip [file d4re00548a1.zip]

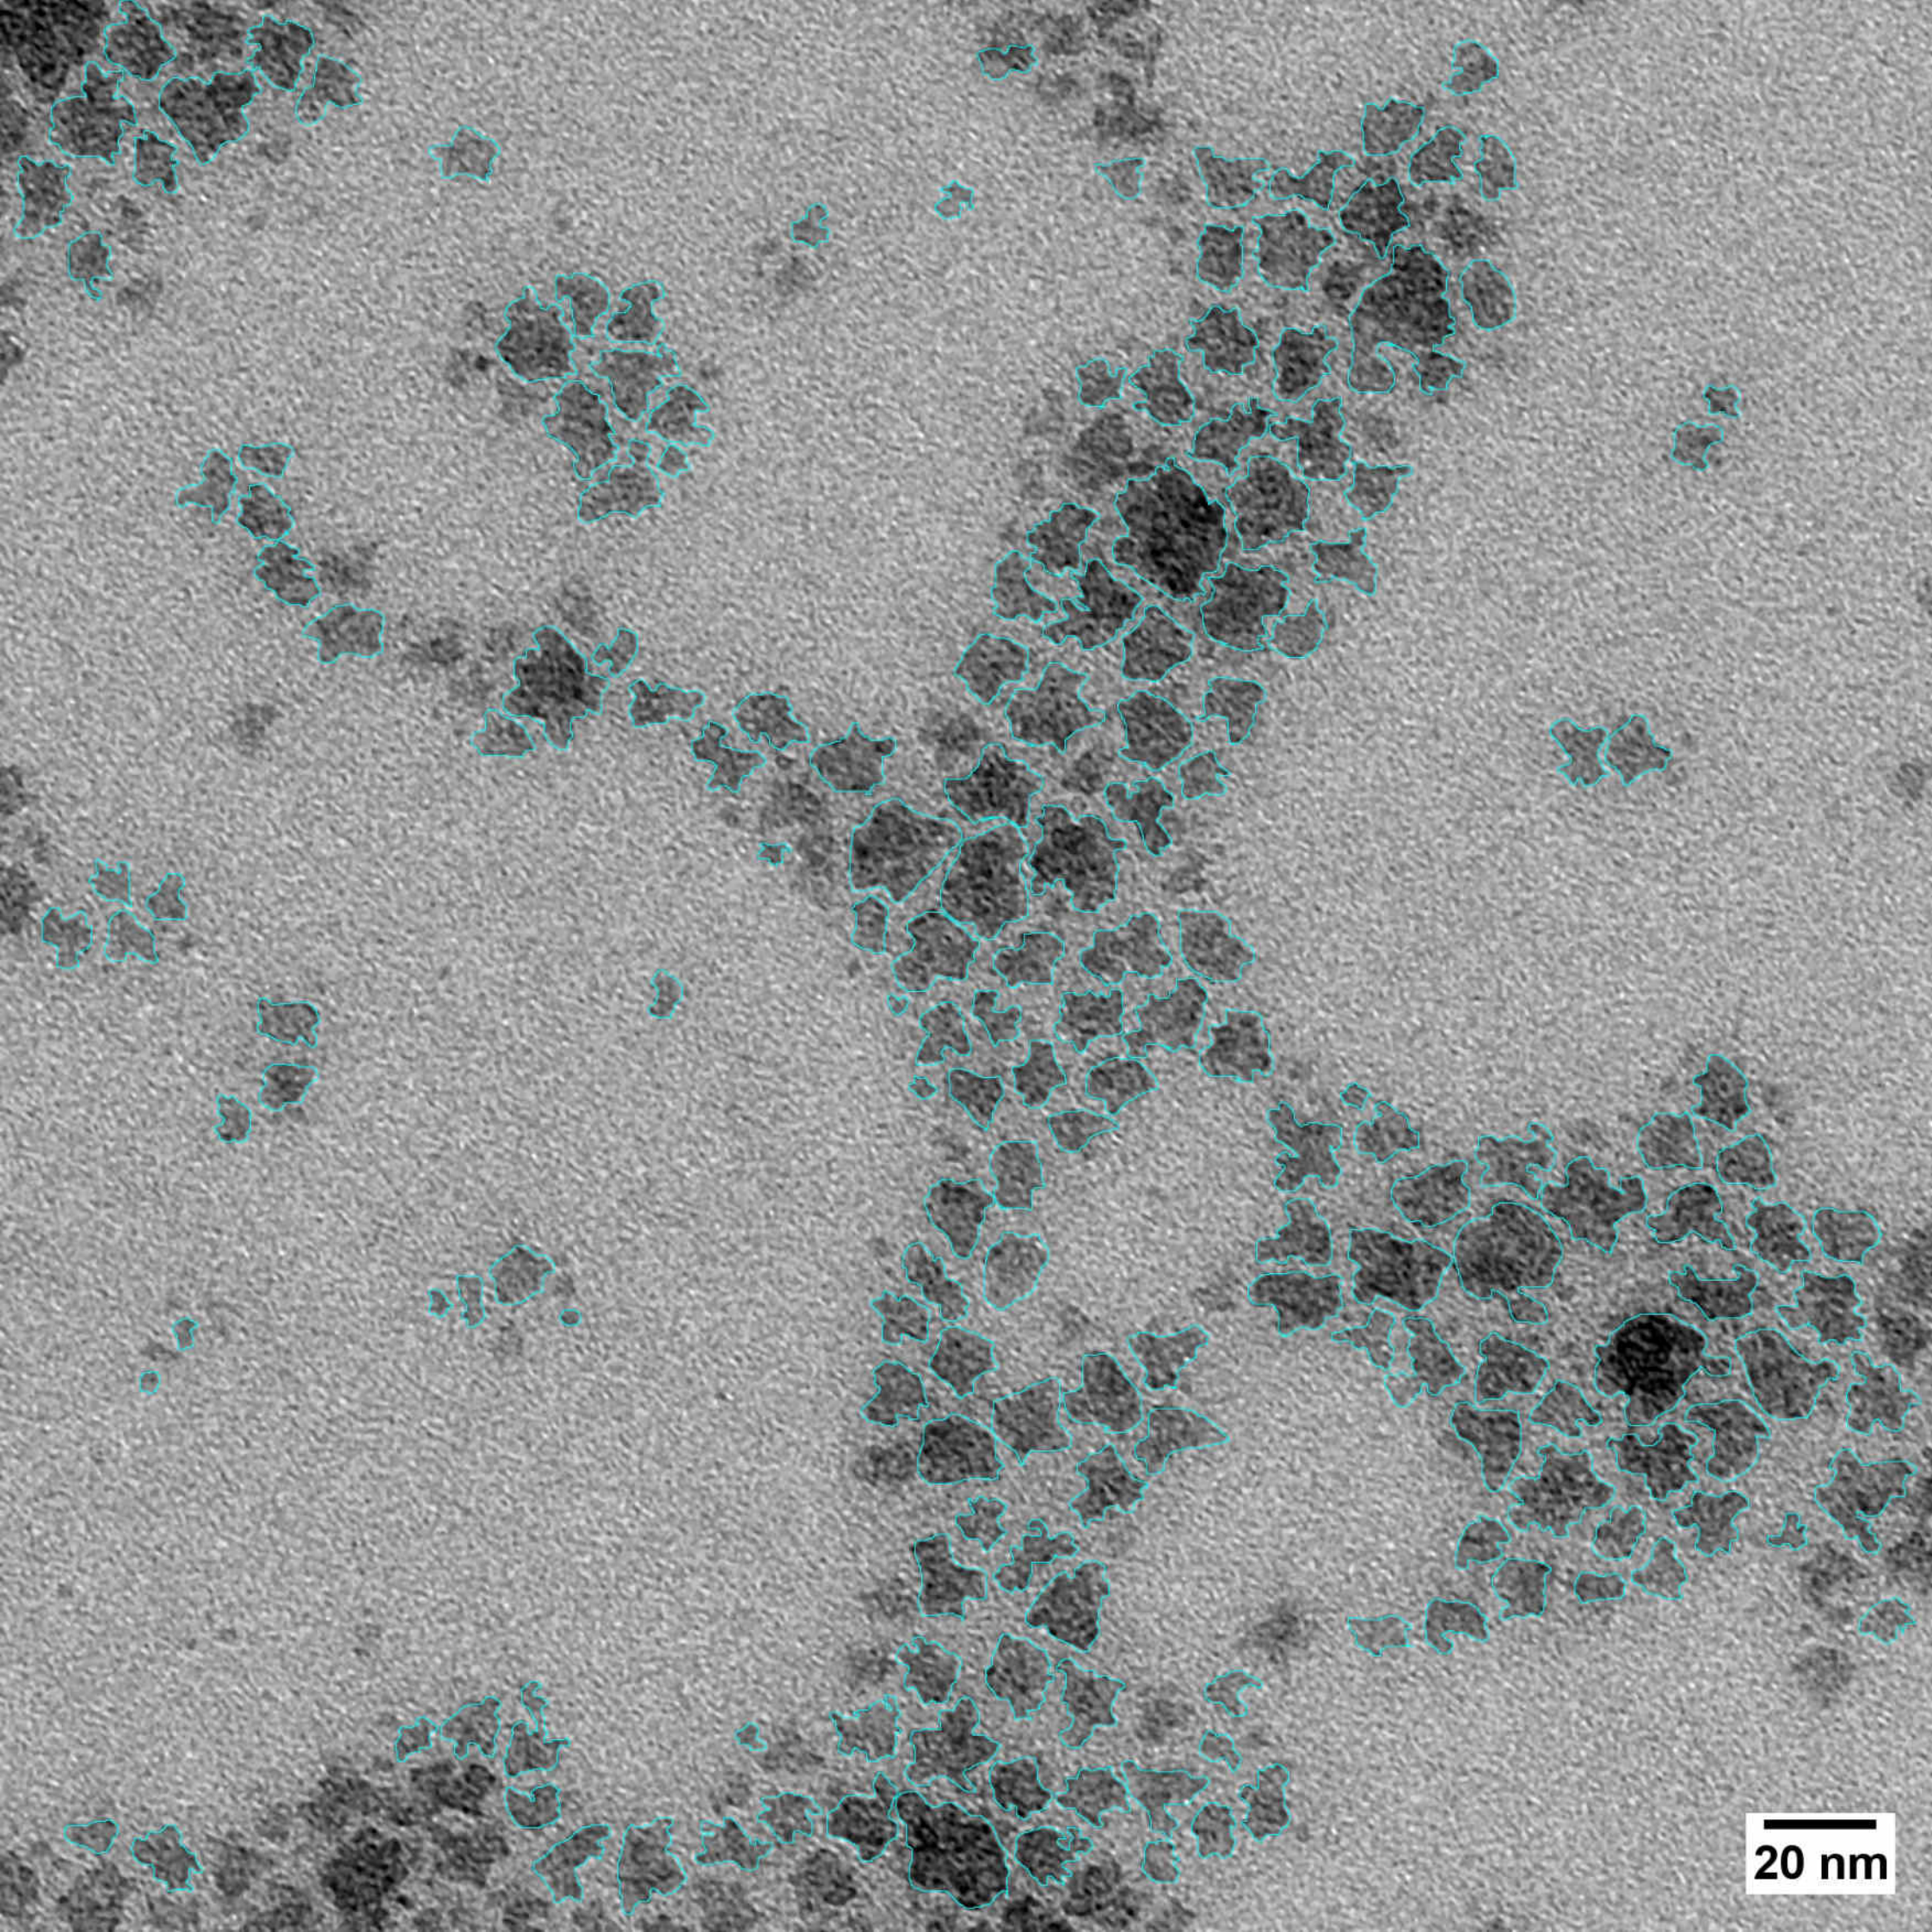

Supplement: d4re00548a1.zip [file d4re00548a1.zip]

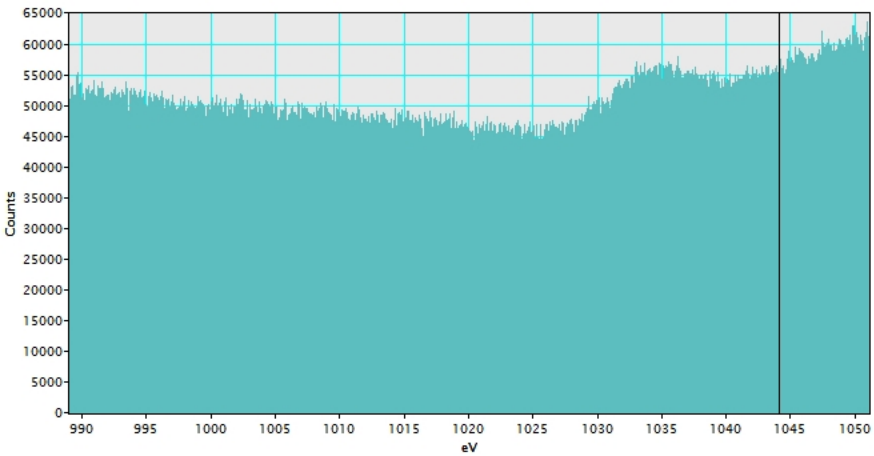

Supplement: d4re00548a1.zip [file d4re00548a1.zip]

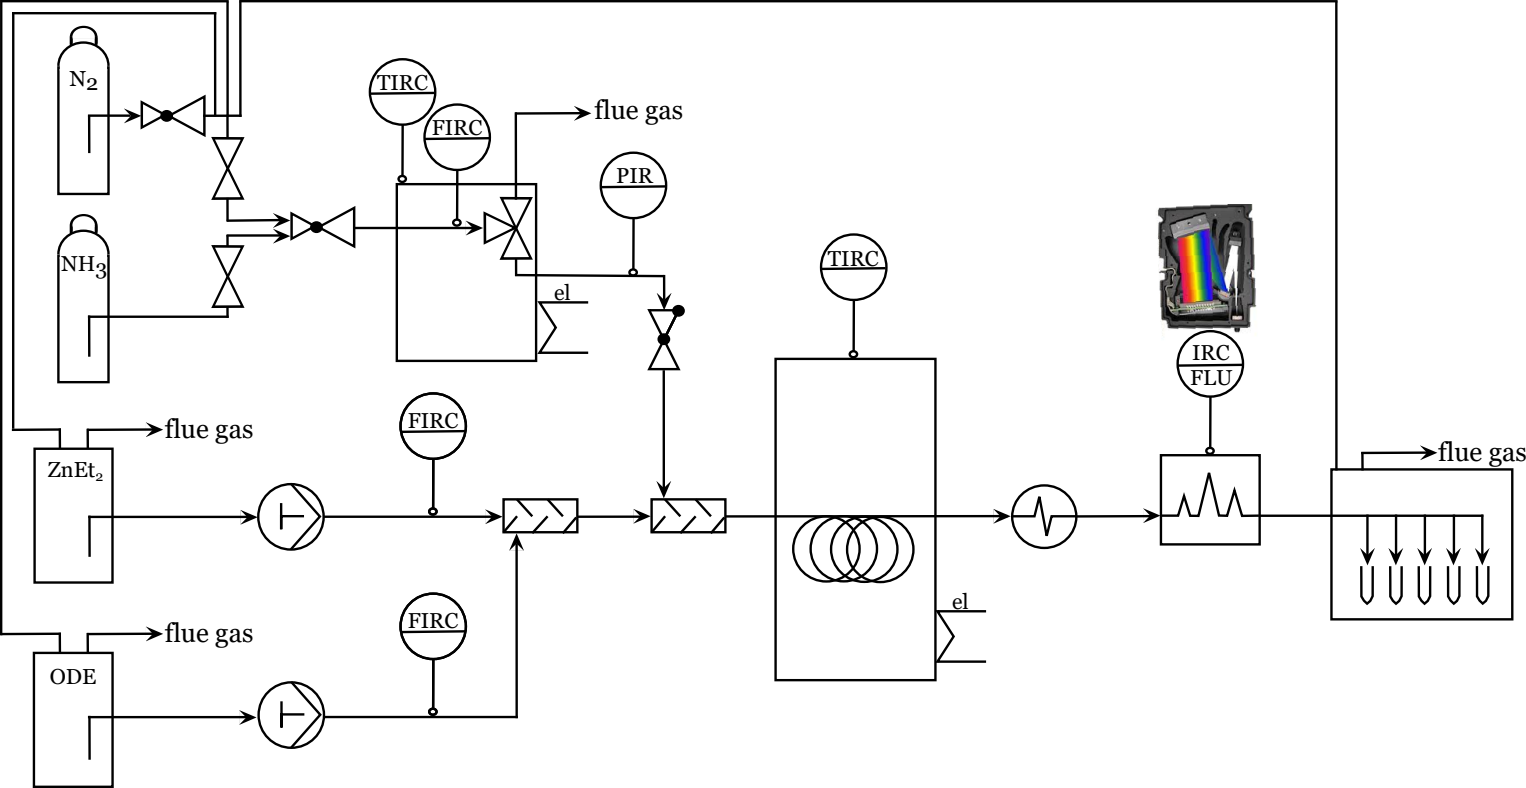

Supplement: d4re00548a1.zip [file d4re00548a1.zip]

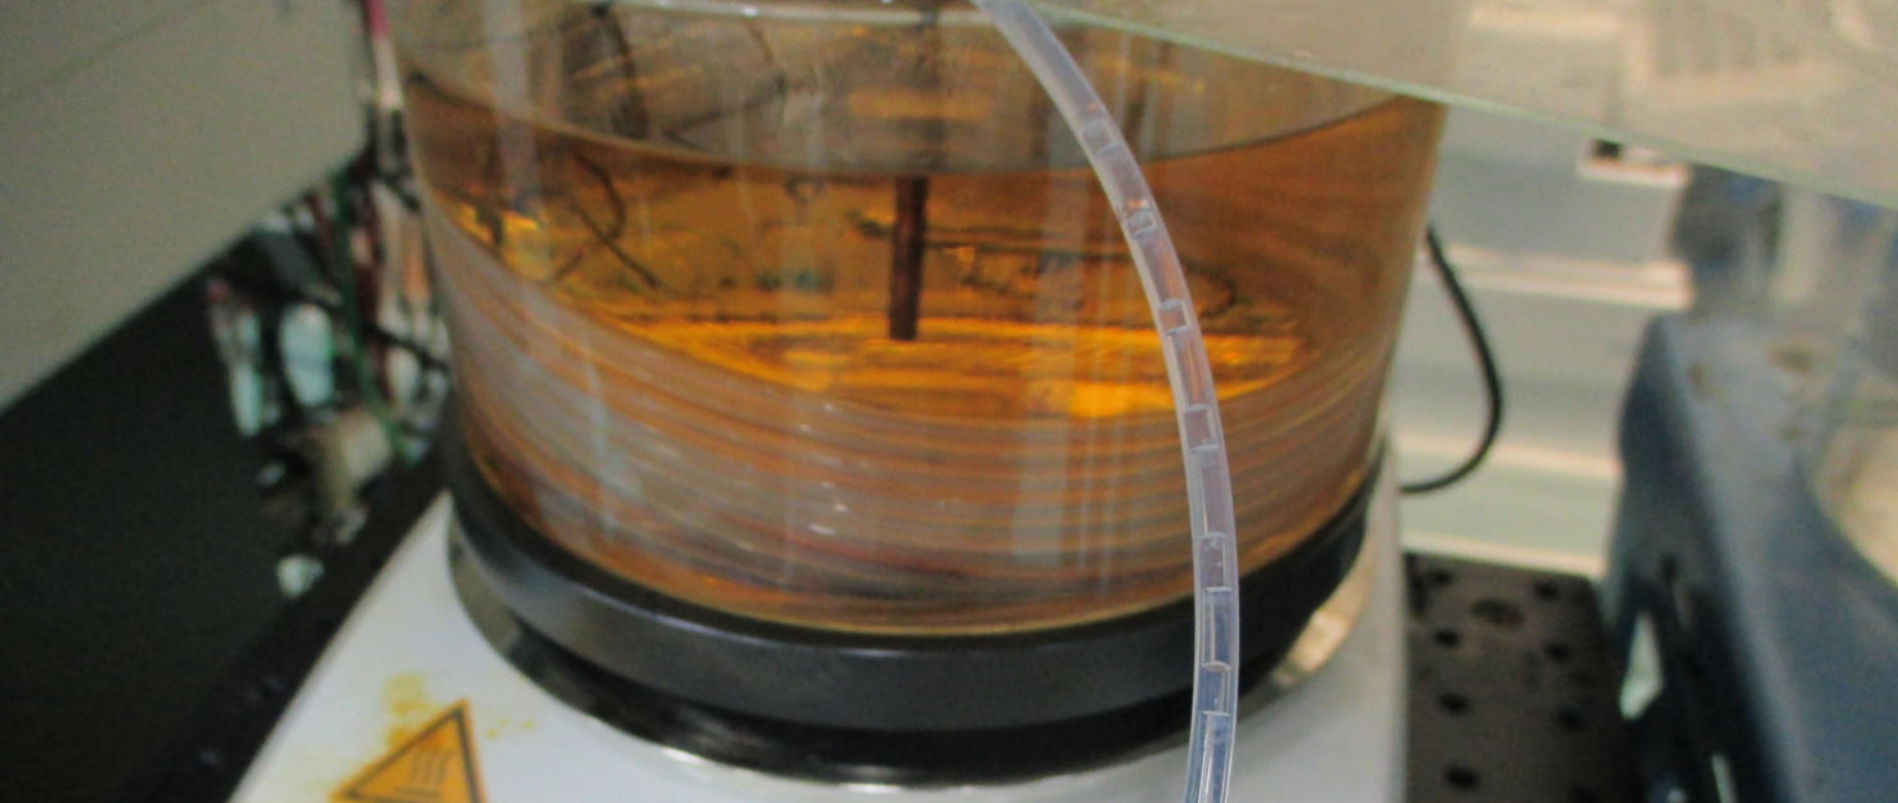

Supplement: d4re00548a1.zip [file d4re00548a1.zip]

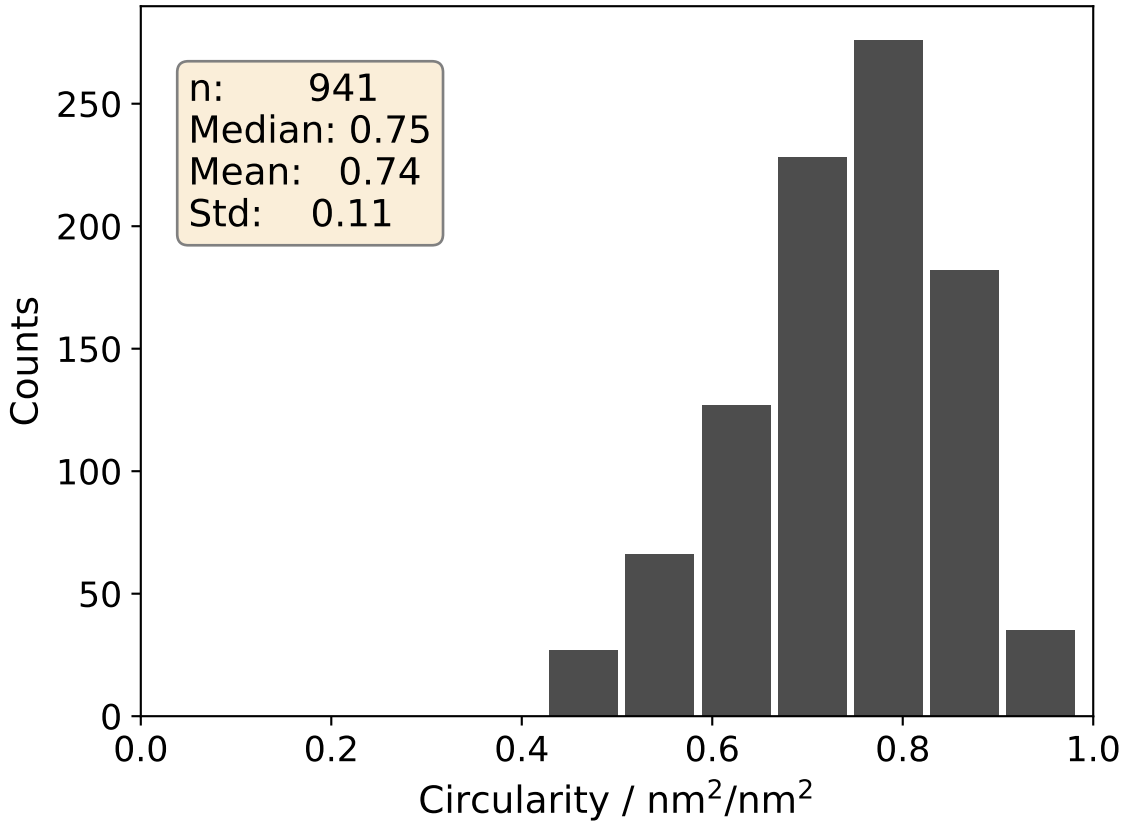

Supplement: d4re00548a1.zip [file d4re00548a1.zip]

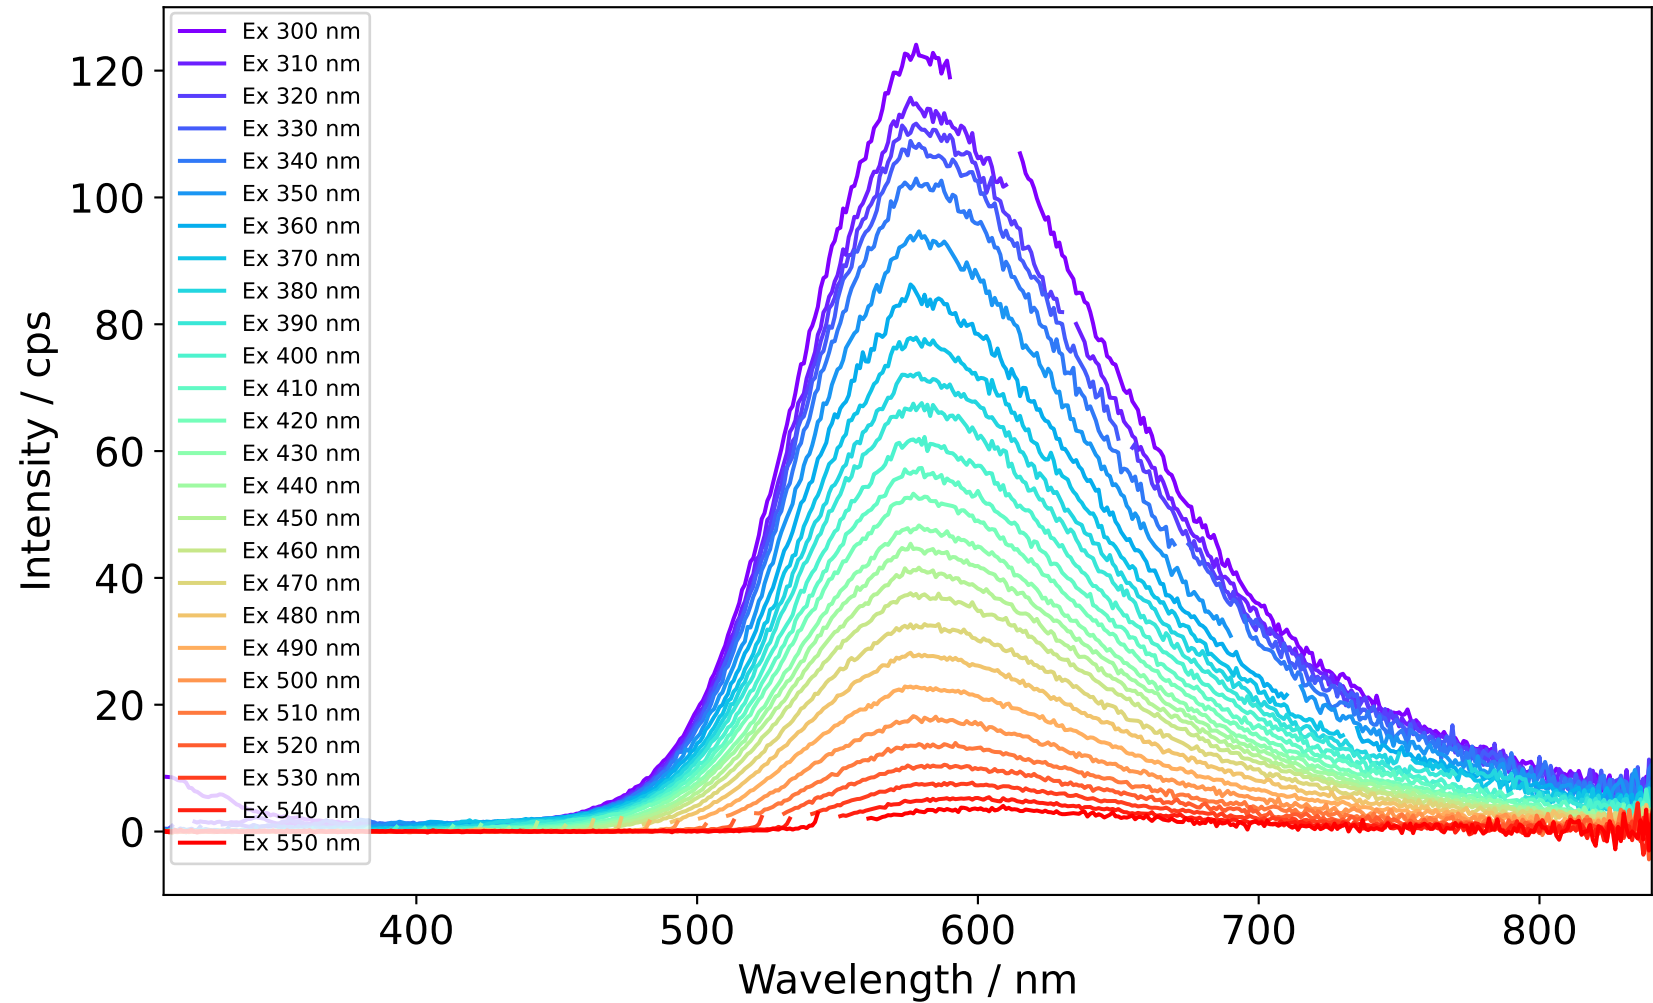

Supplement: d4re00548a1.zip [file d4re00548a1.zip]

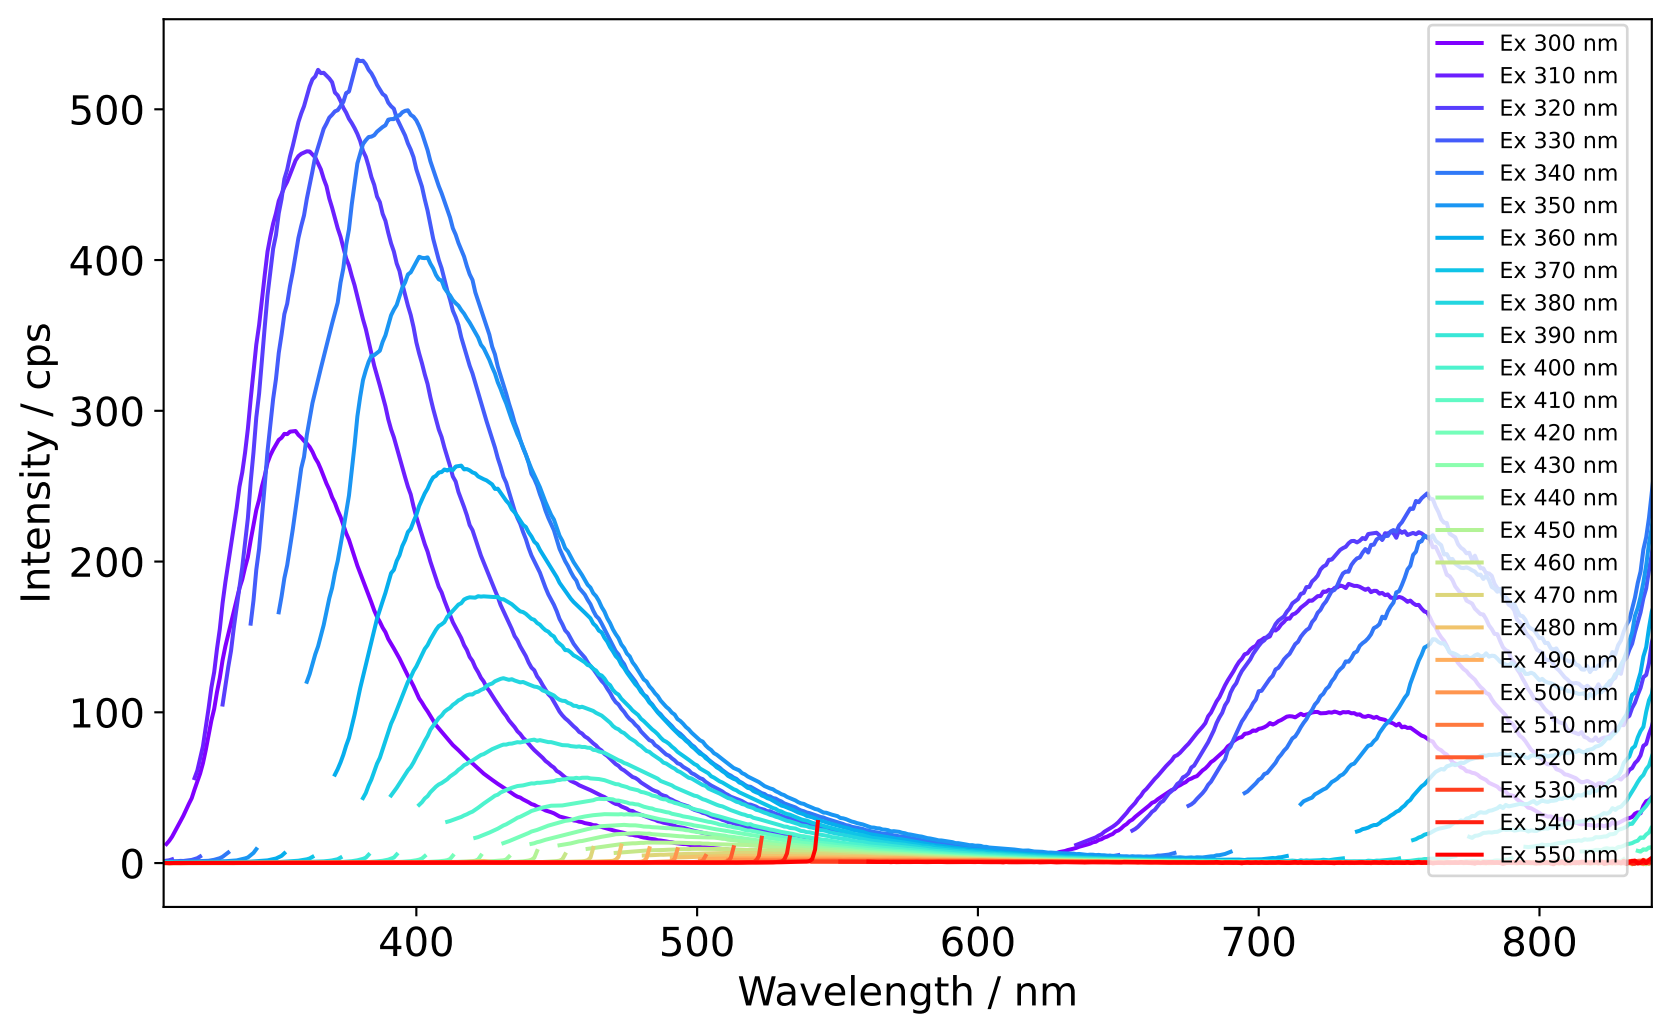

Supplement: d4re00548a1.zip [file d4re00548a1.zip]

235g

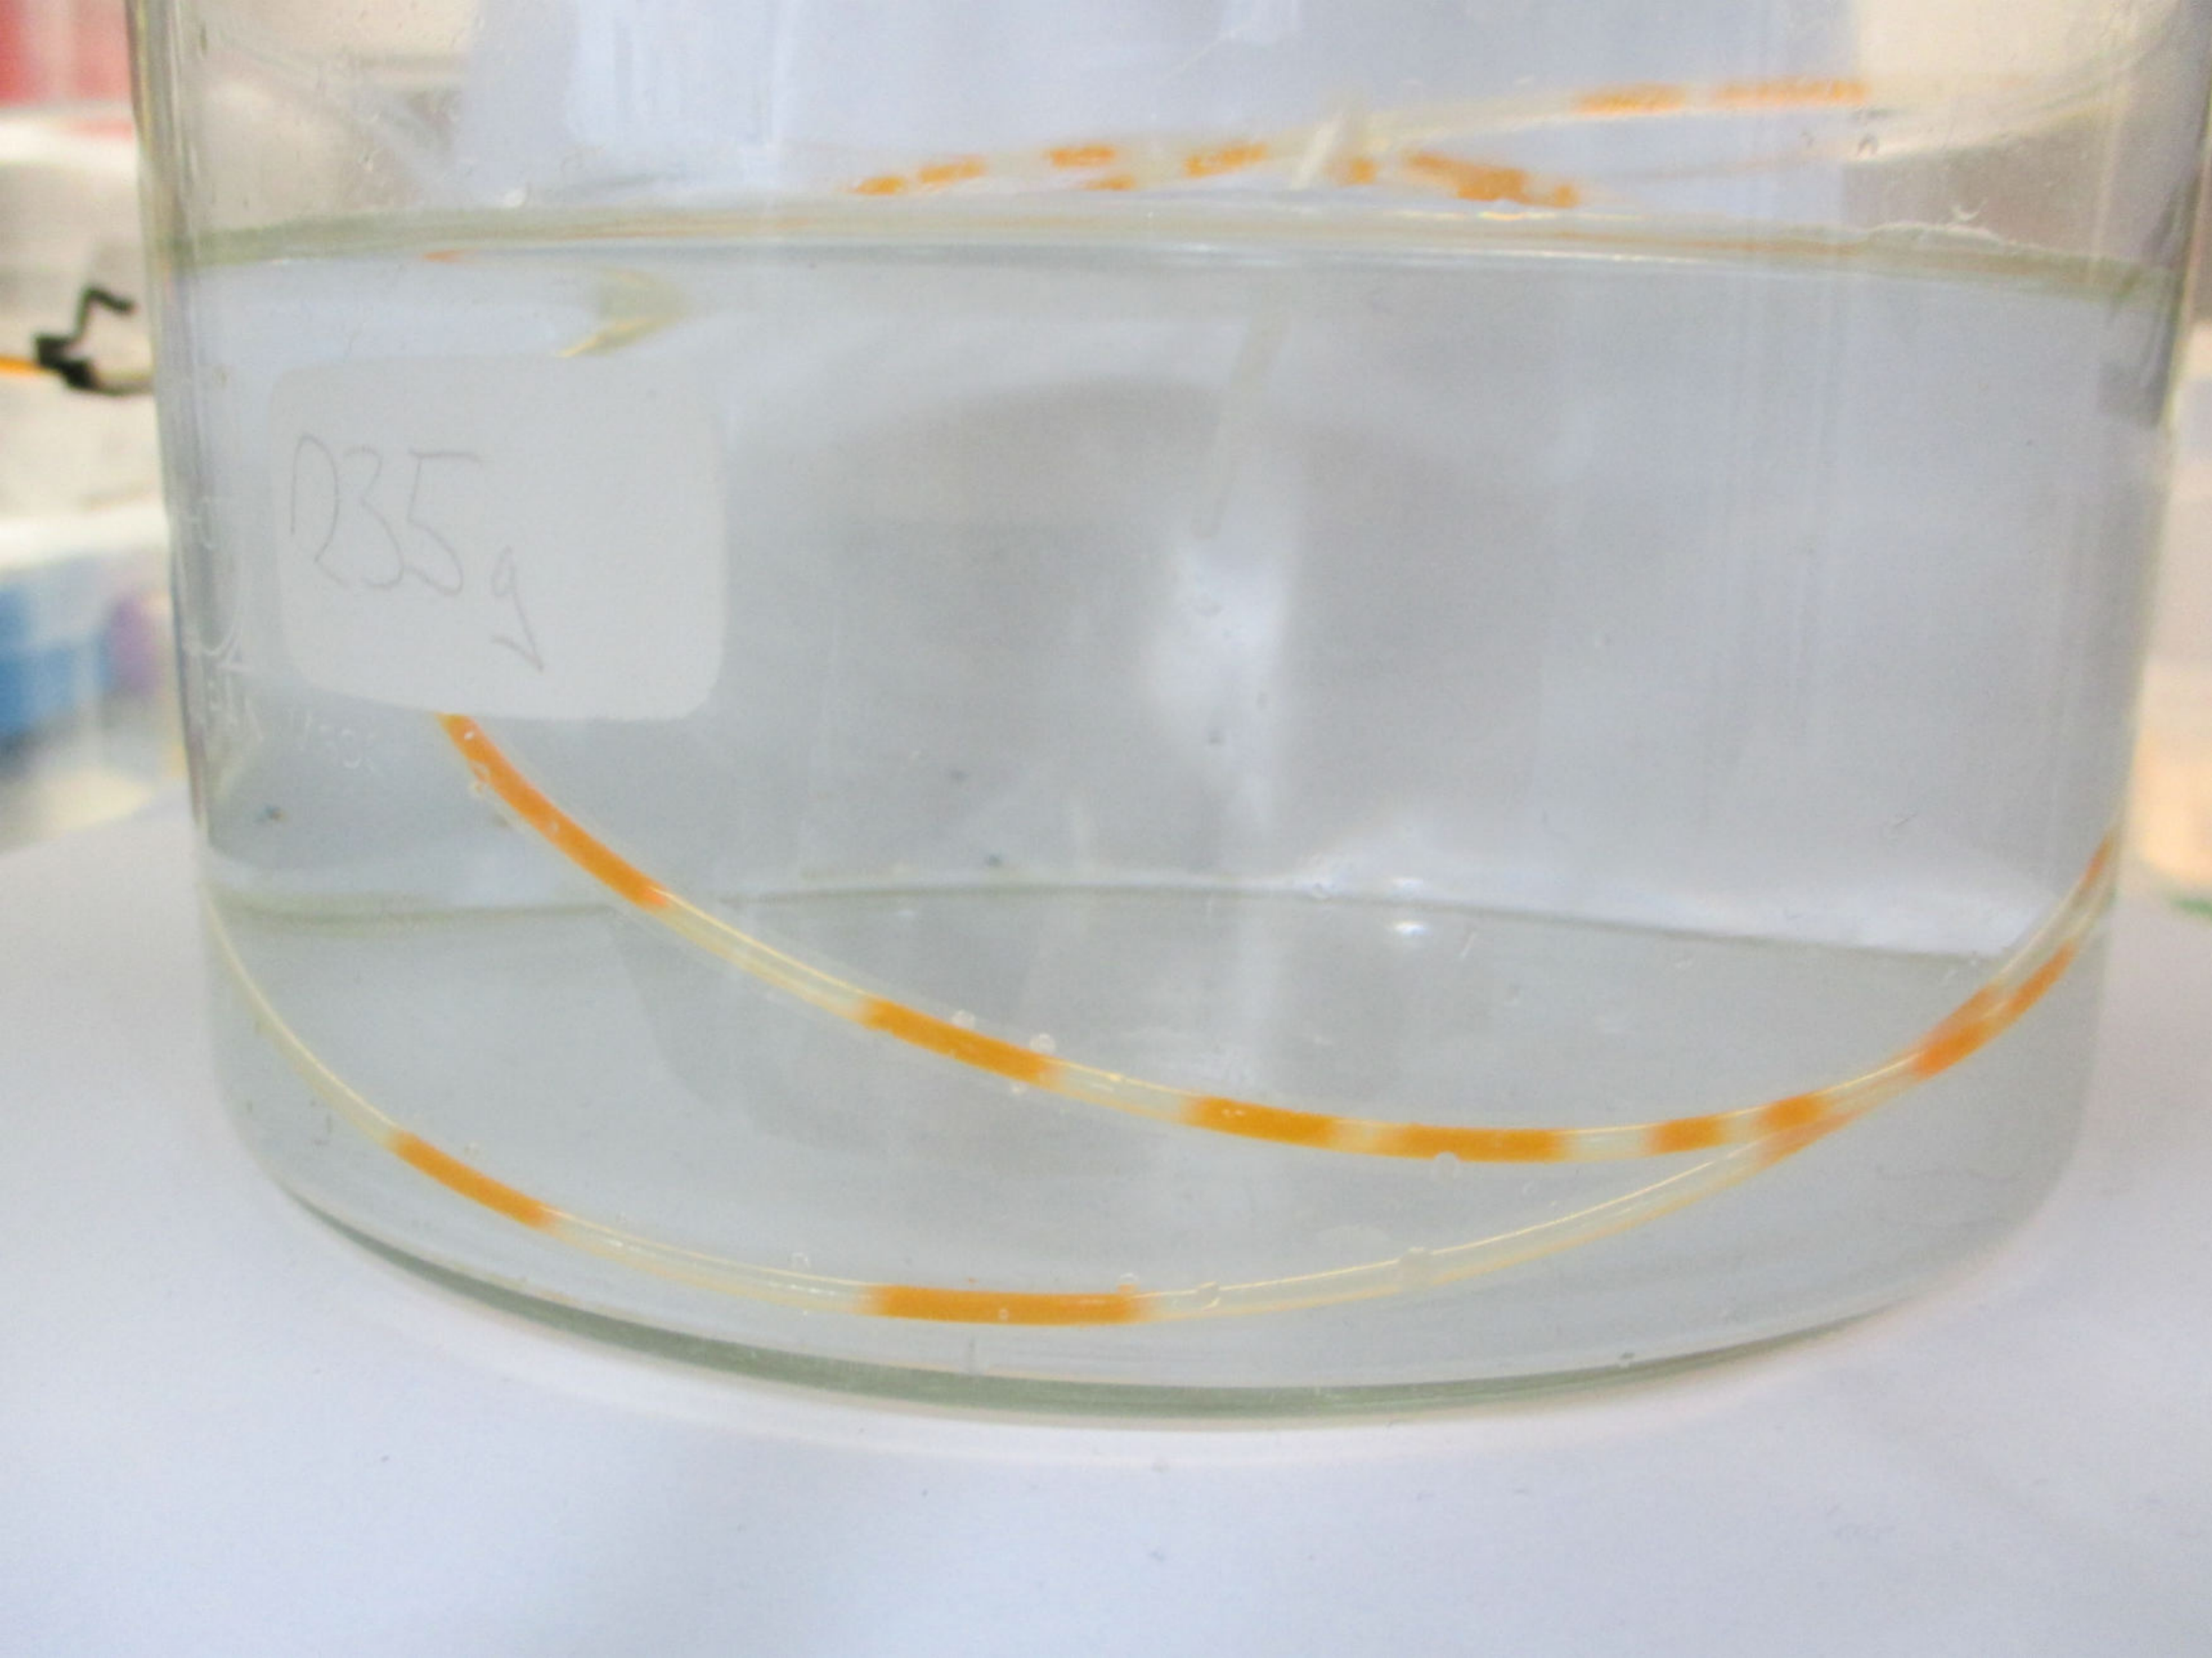

Supplement: d4re00548a1.zip [file d4re00548a1.zip]

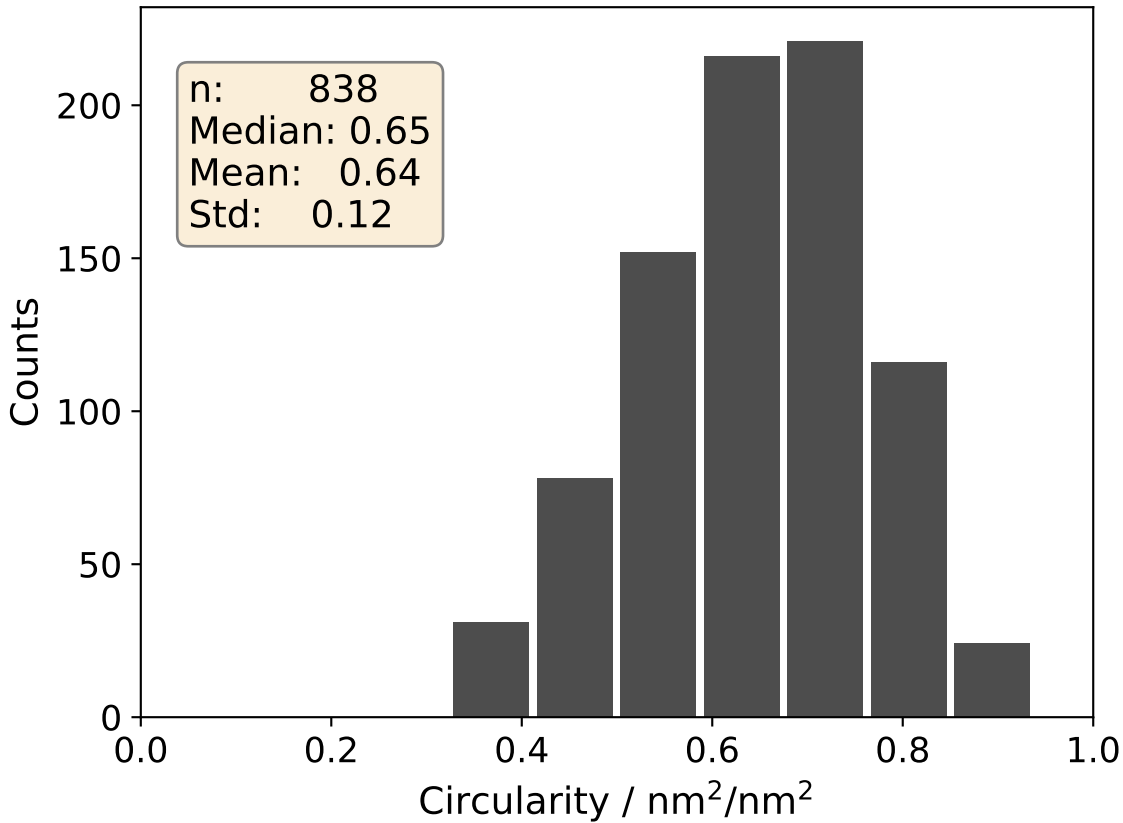

Supplement: d4re00548a1.zip [file d4re00548a1.zip]

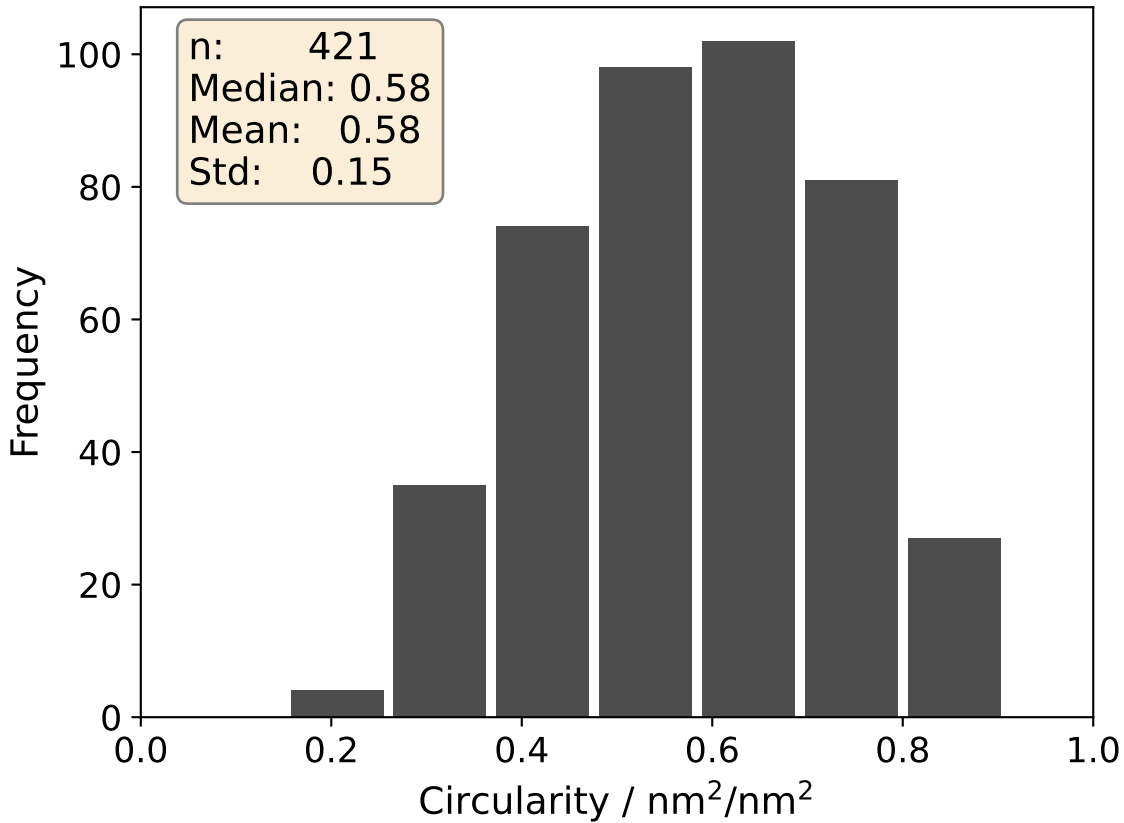

Supplement: d4re00548a1.zip [file d4re00548a1.zip]

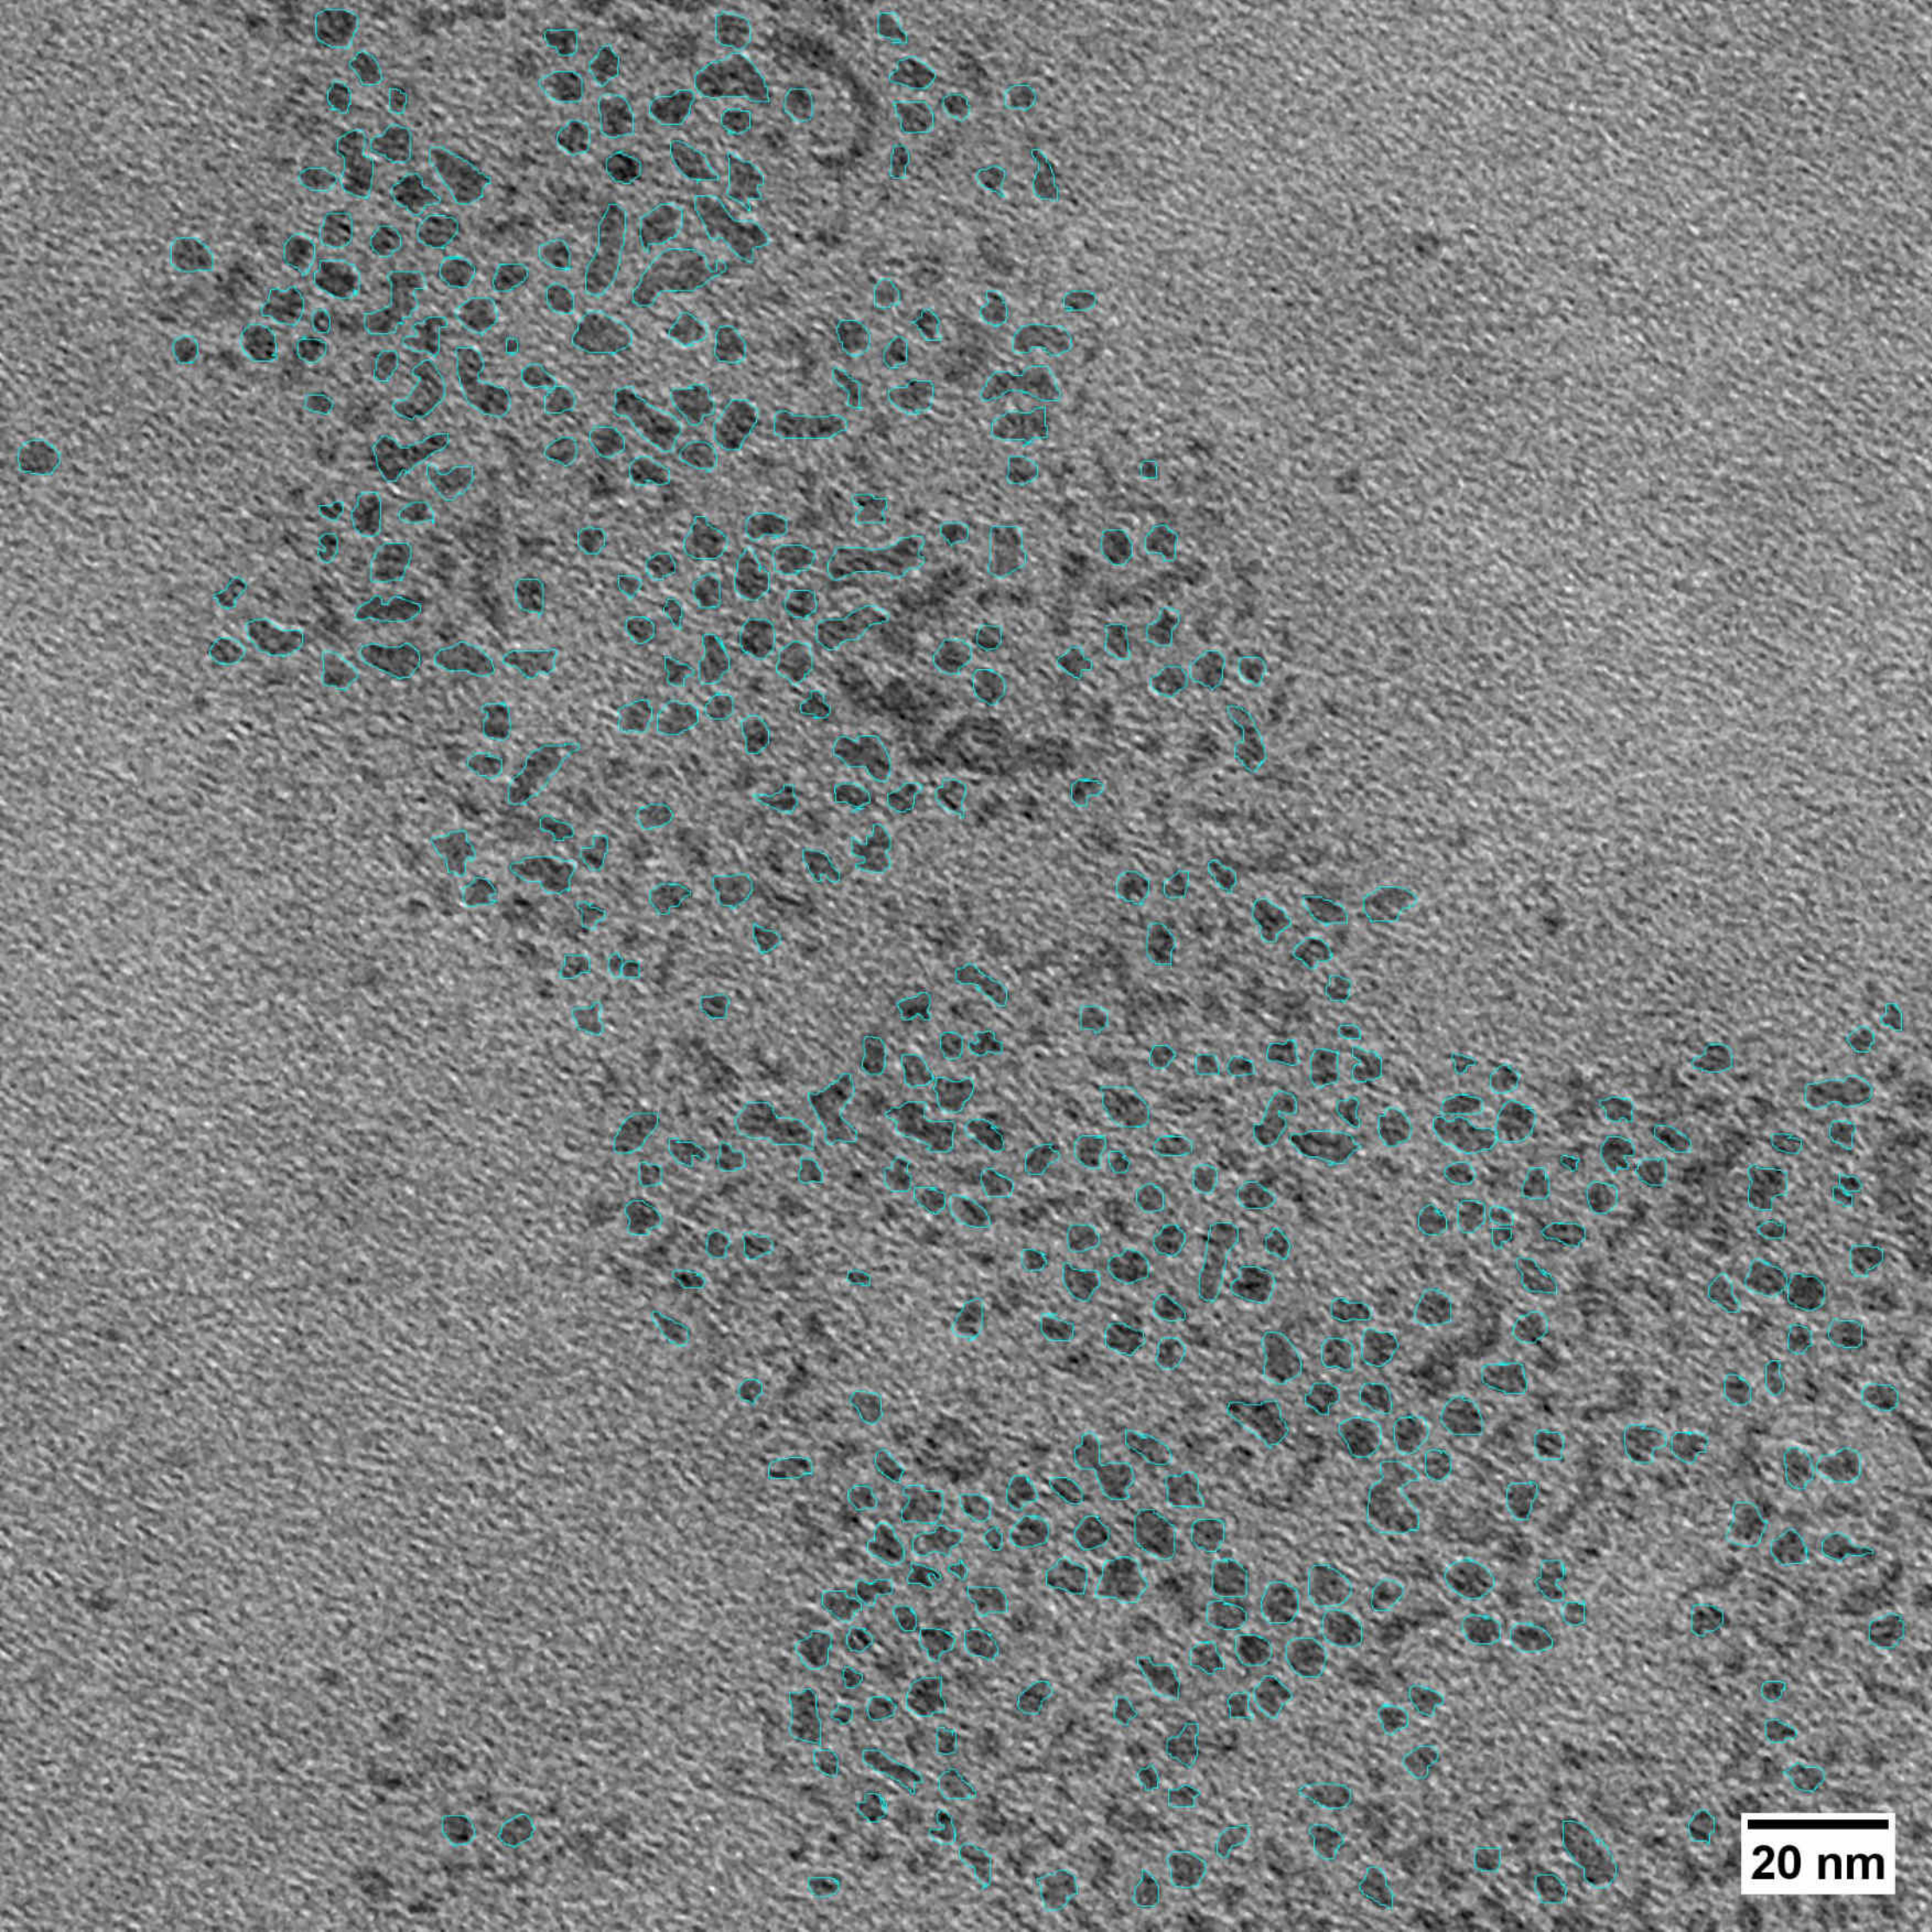

20 nm

Supplement: d4re00548a1.zip [file d4re00548a1.zip]

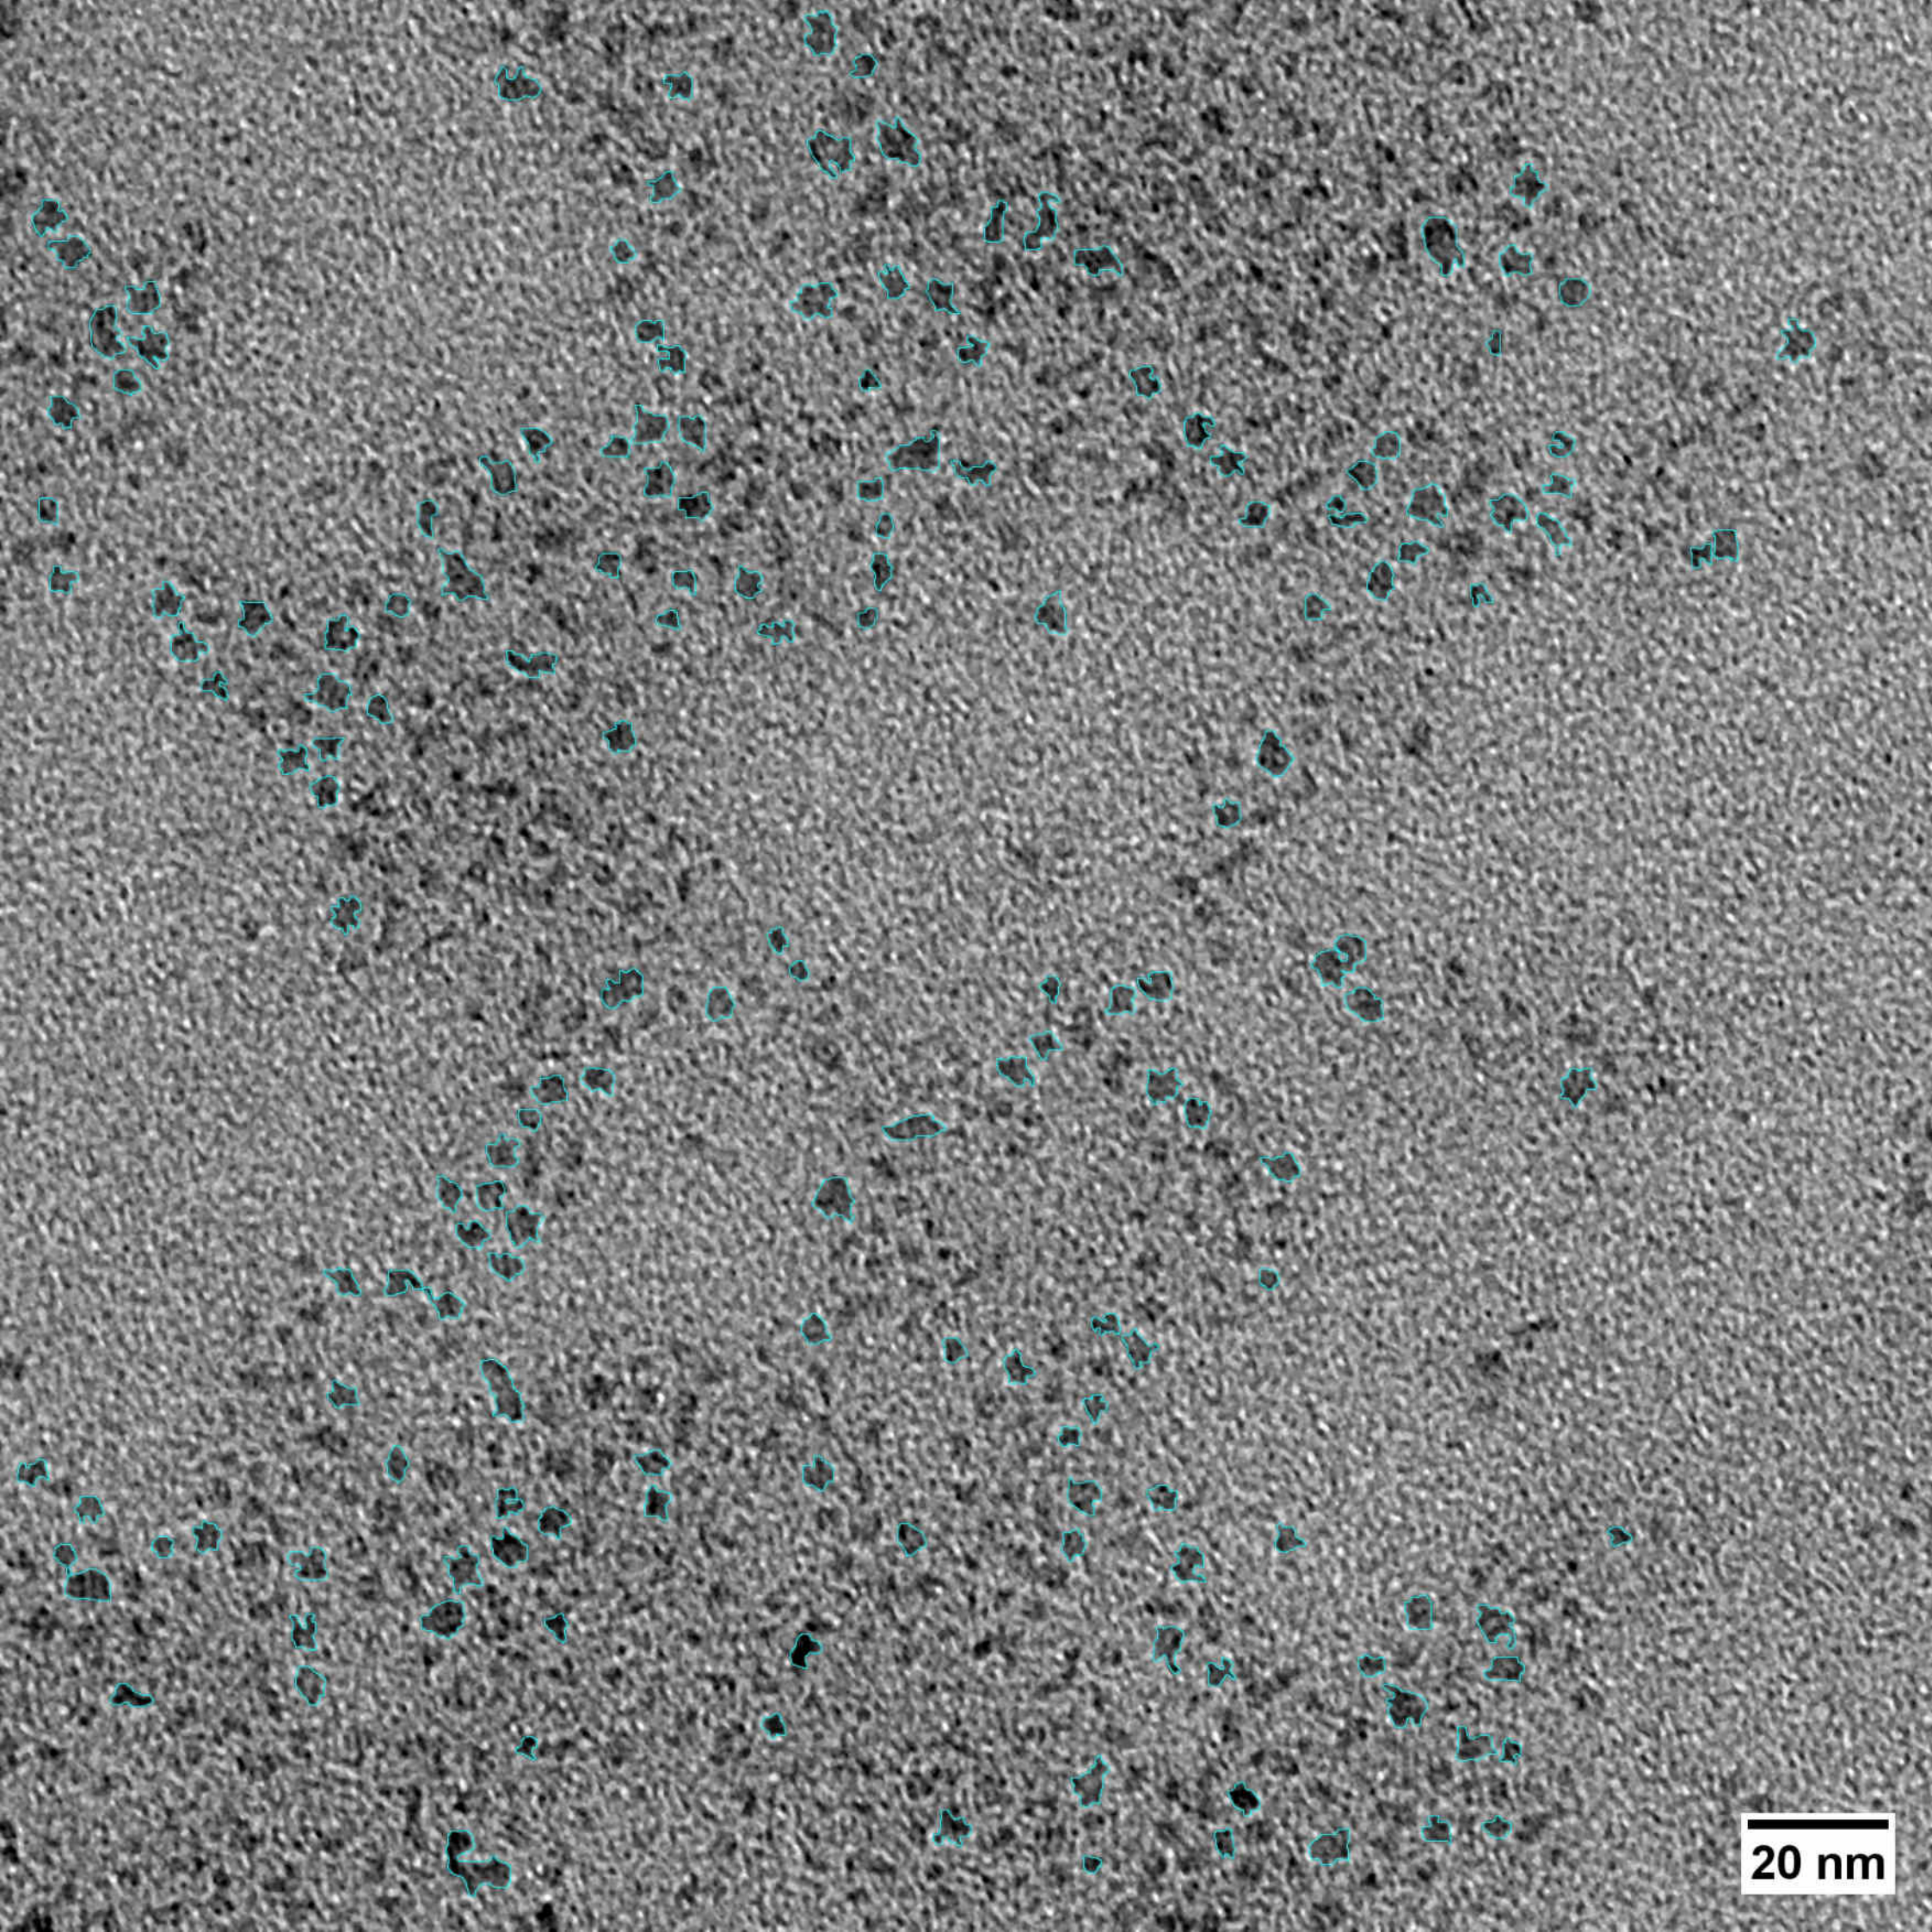

20 nm

Supplement: d4re00548a1.zip [file d4re00548a1.zip]

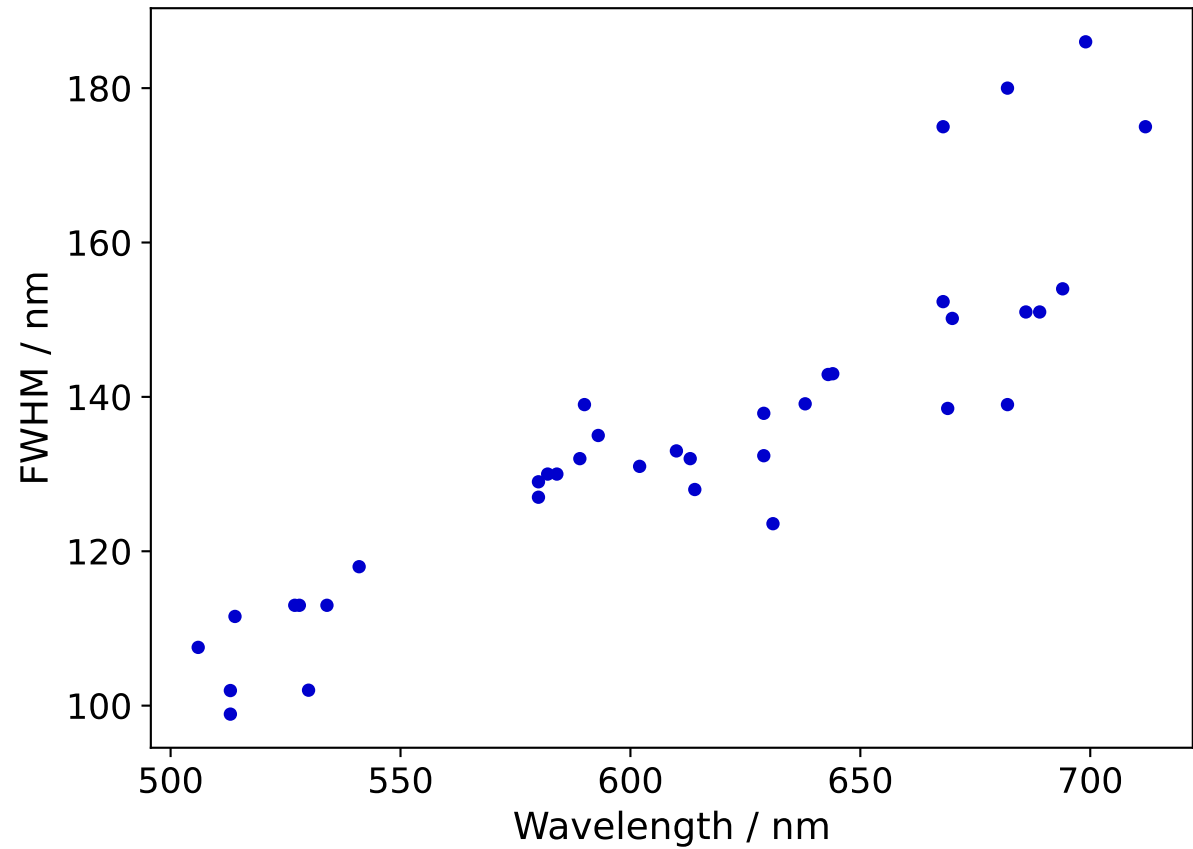

Supplement: d4re00548a1.zip [file d4re00548a1.zip]

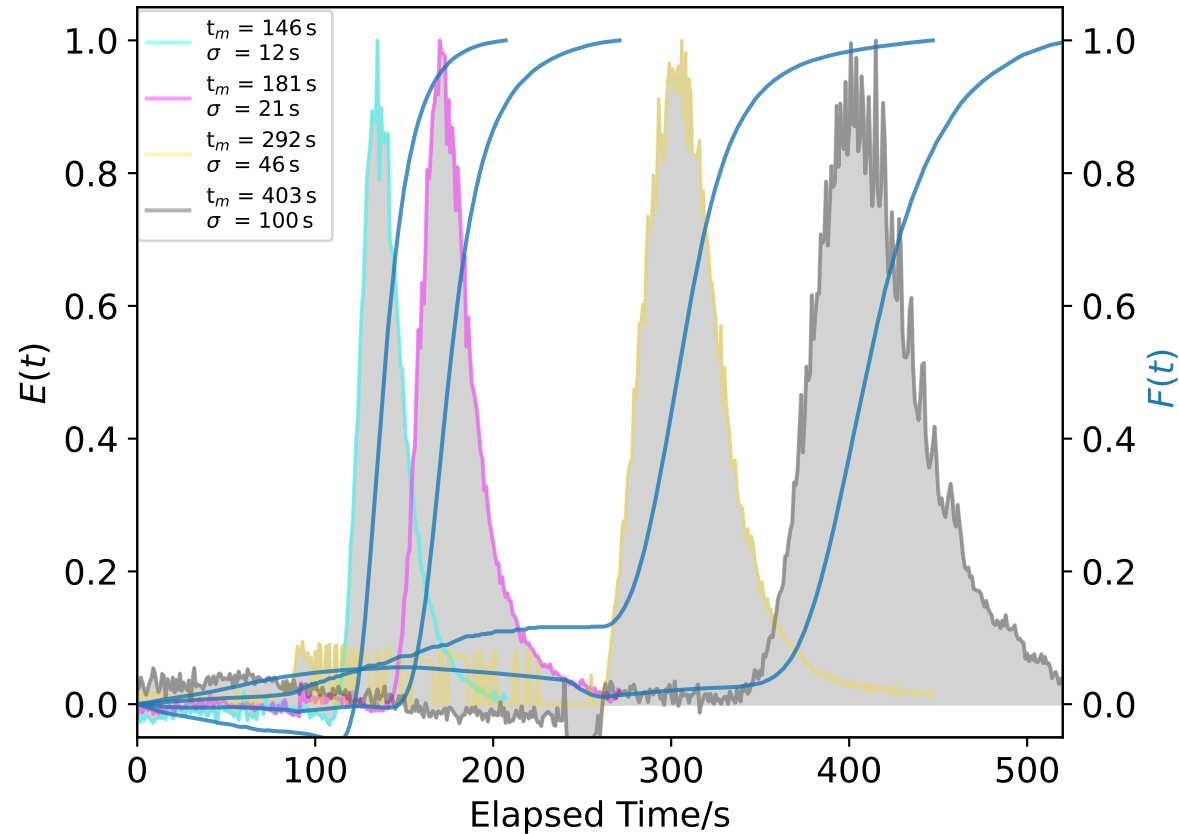

Supplement: d4re00548a1.zip [file d4re00548a1.zip]

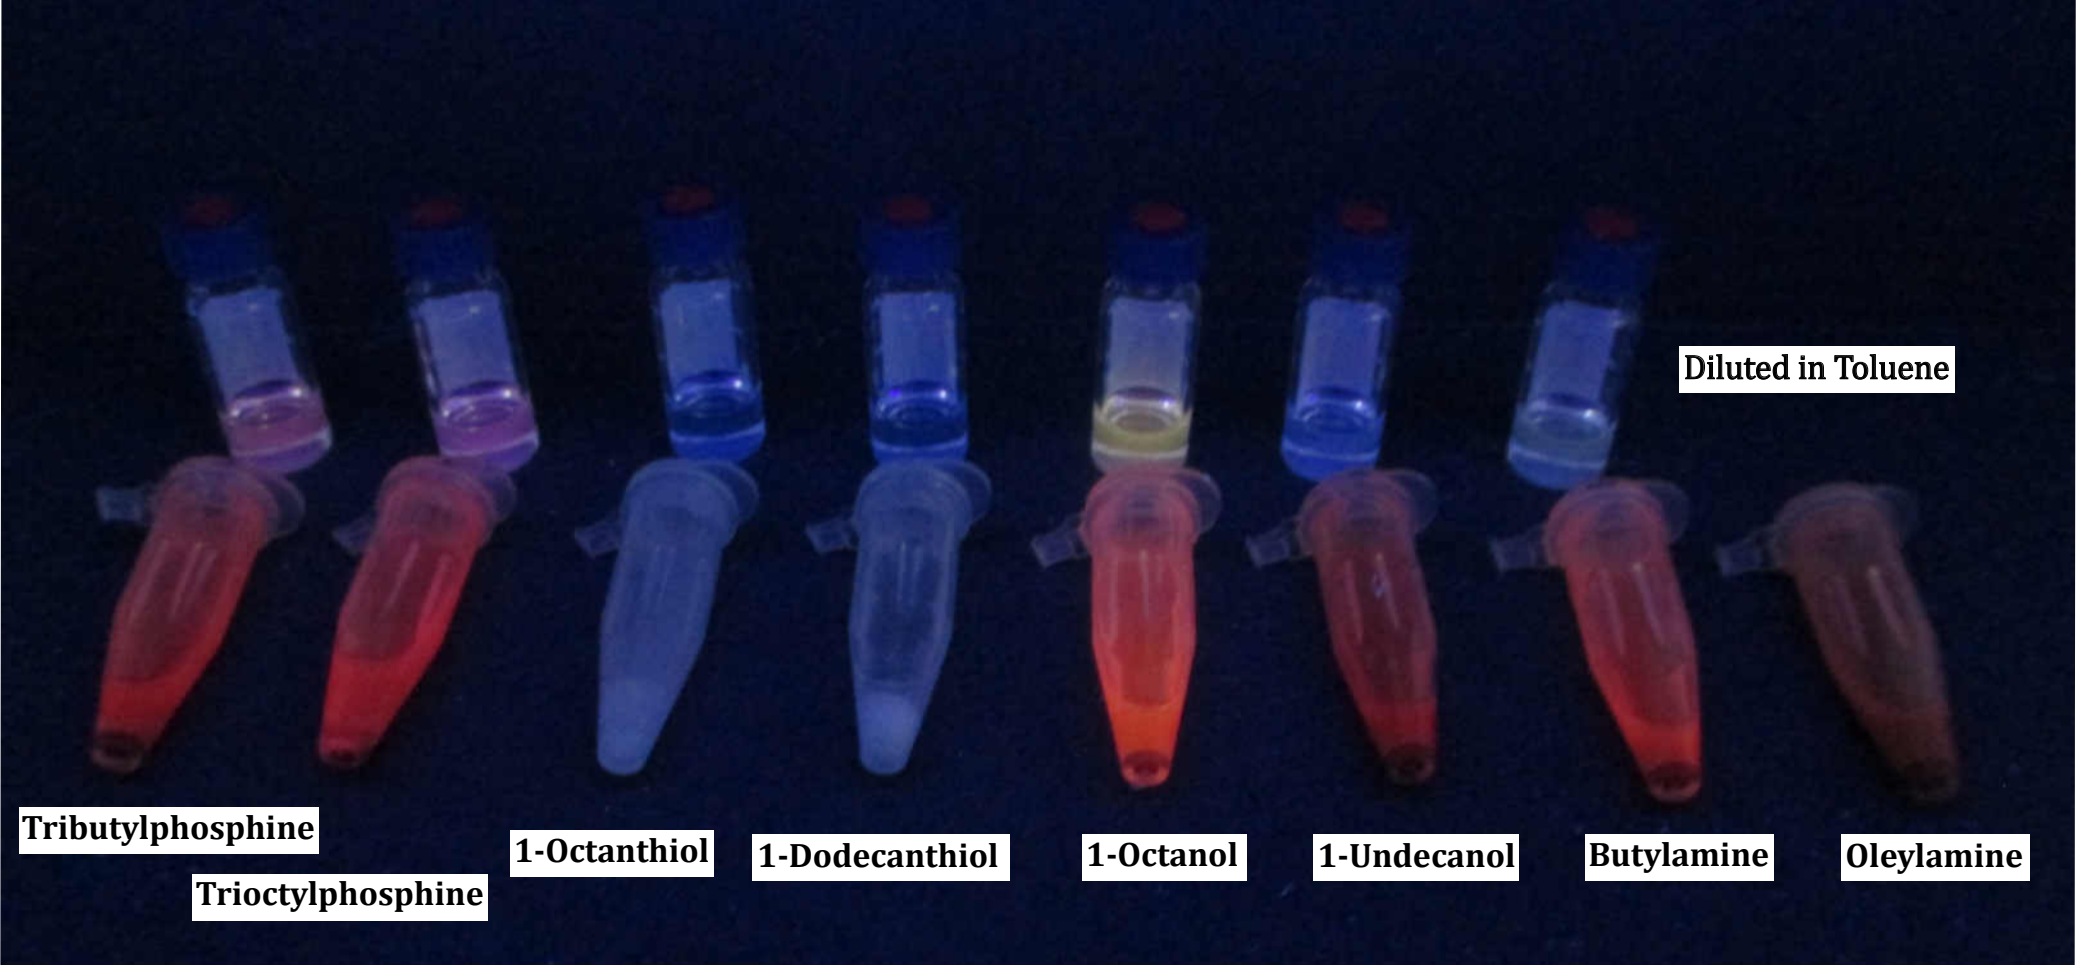

Supplement: d4re00548a1.zip [file d4re00548a1.zip]

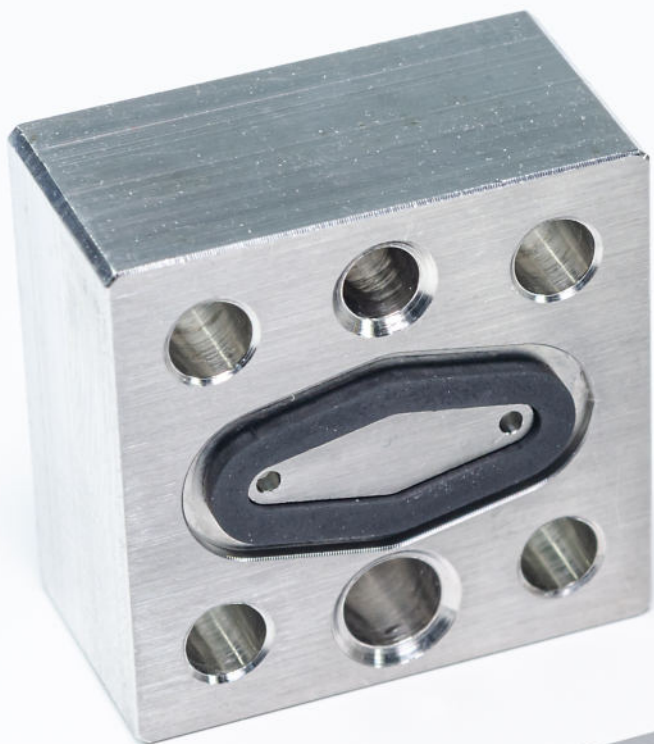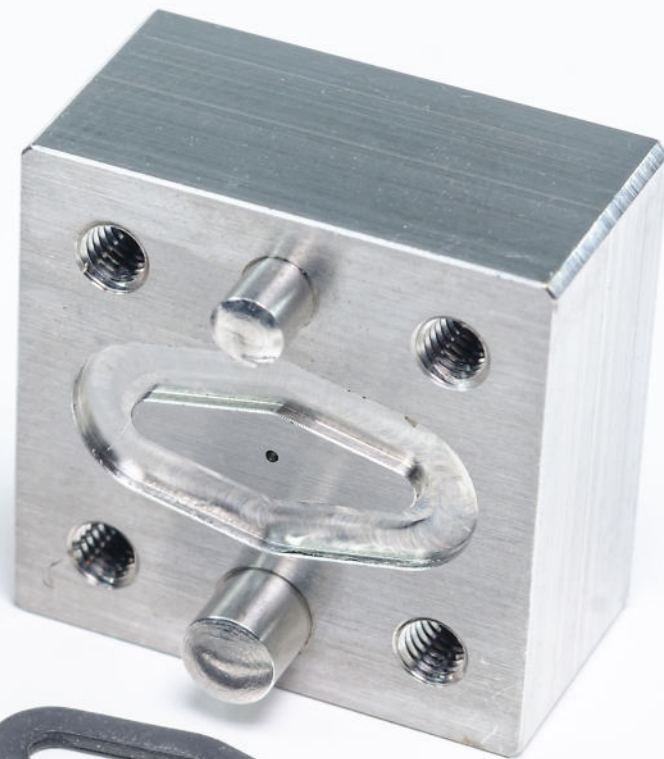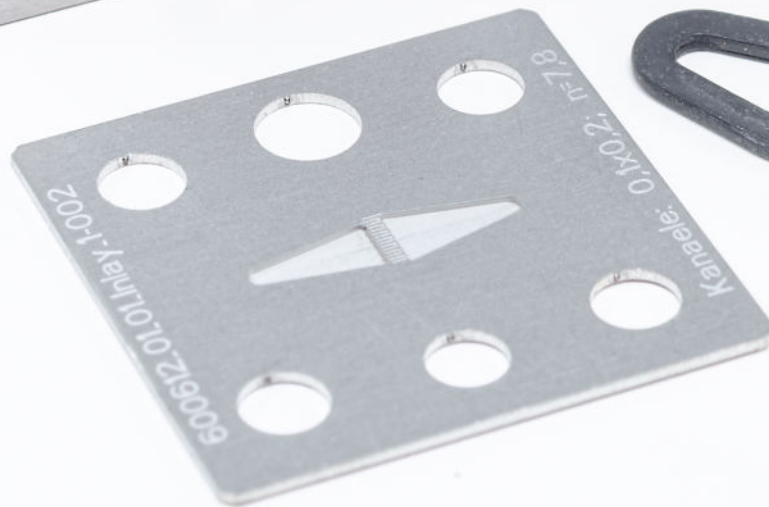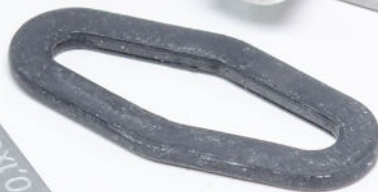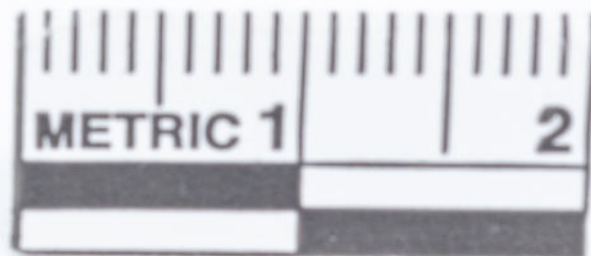

Supplement: d4re00548a1.zip [file d4re00548a1.zip]

# Toluene Anhydrous, Inertgas

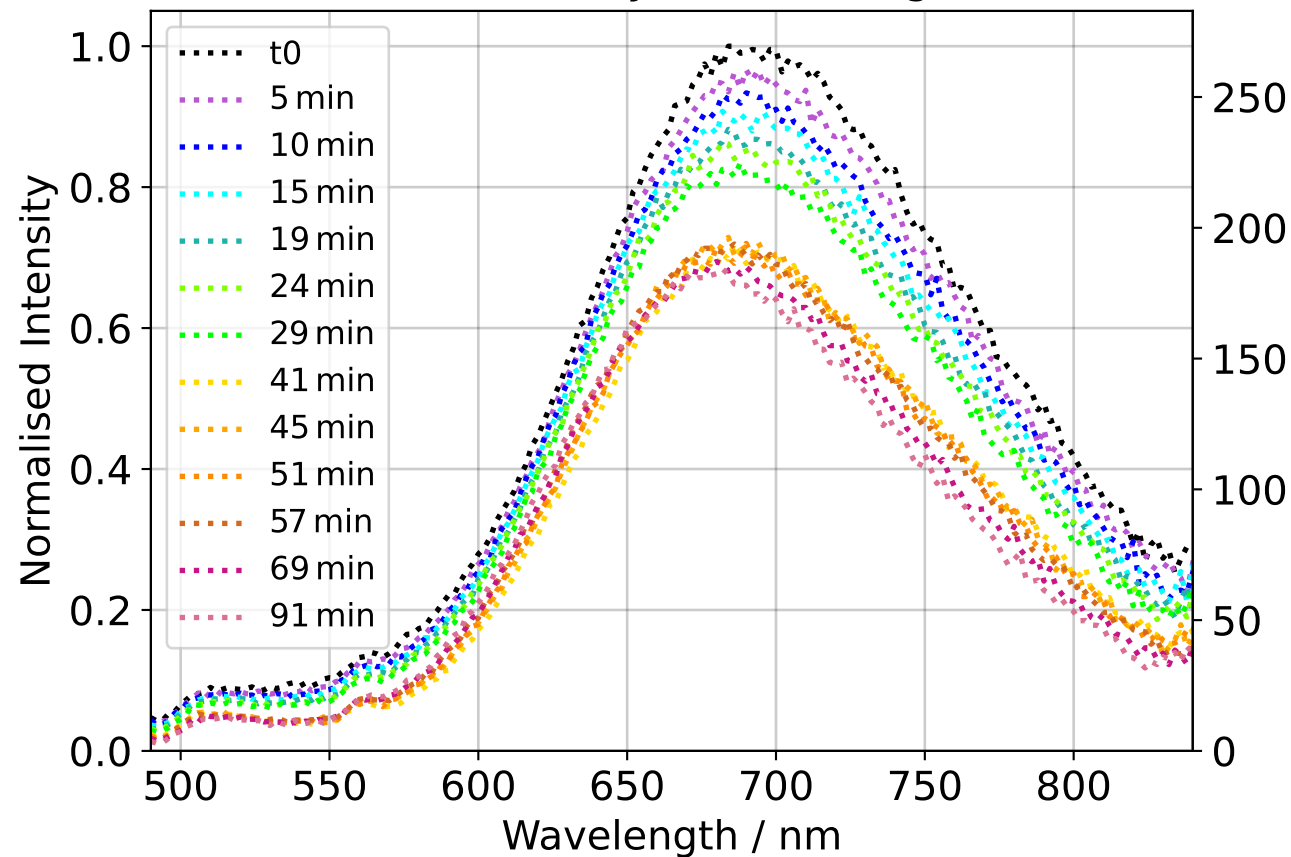

Supplement: d4re00548a1.zip [file d4re00548a1.zip]

# Toluene Anhydrous, Atmosphere

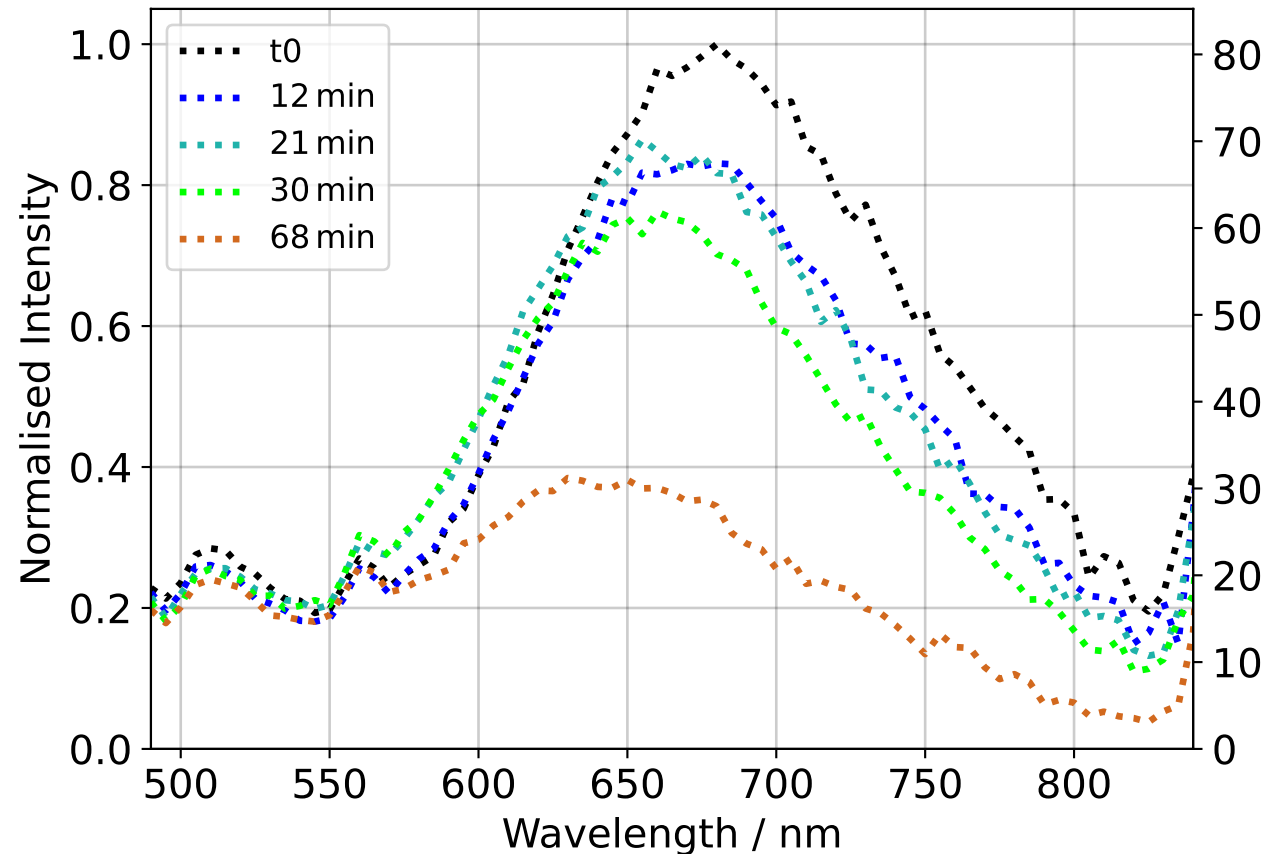

Supplement: d4re00548a1.zip [file d4re00548a1.zip]

# Additionally Dried Toluene, Atmosphere

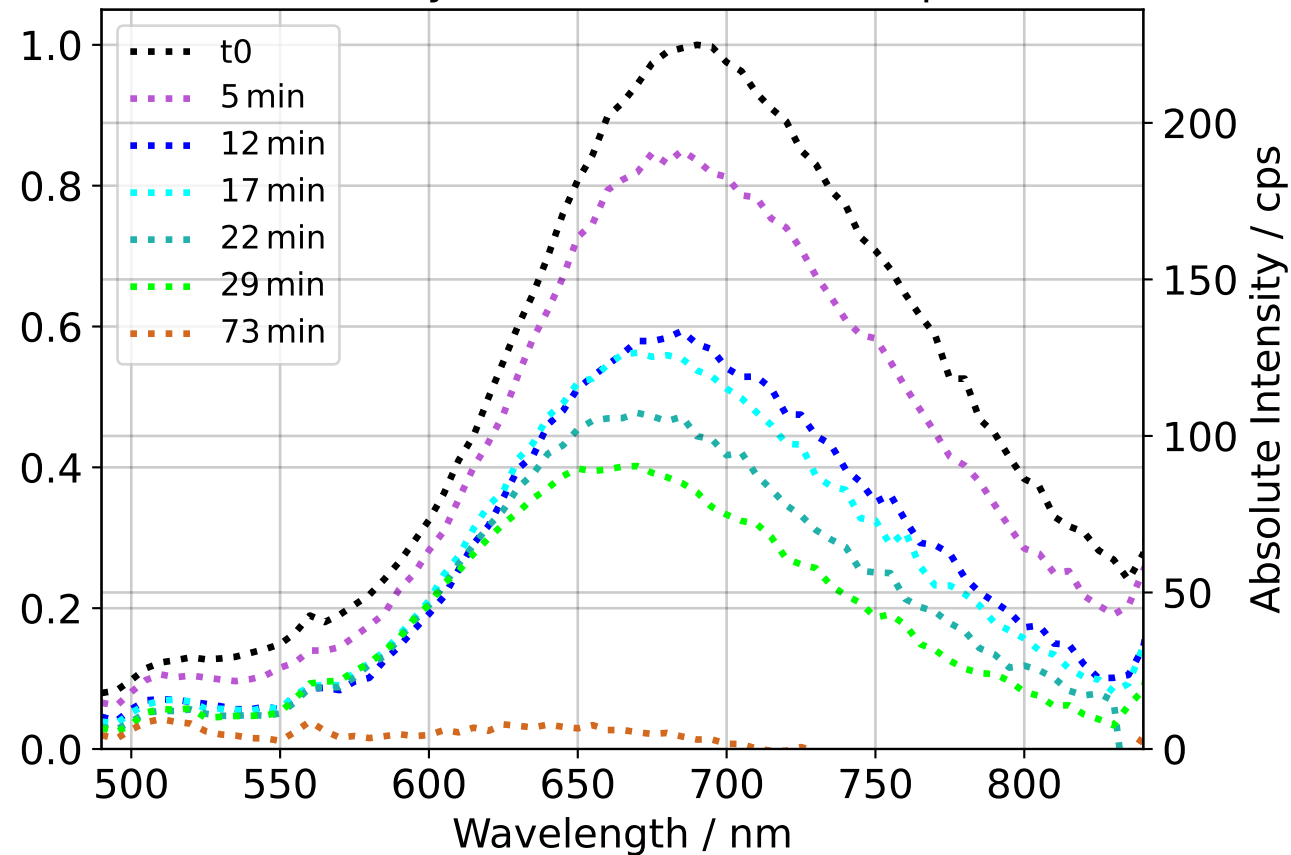

Supplement: d4re00548a1.zip [file d4re00548a1.zip]

# Additionally Dried Toluene, Inertgas

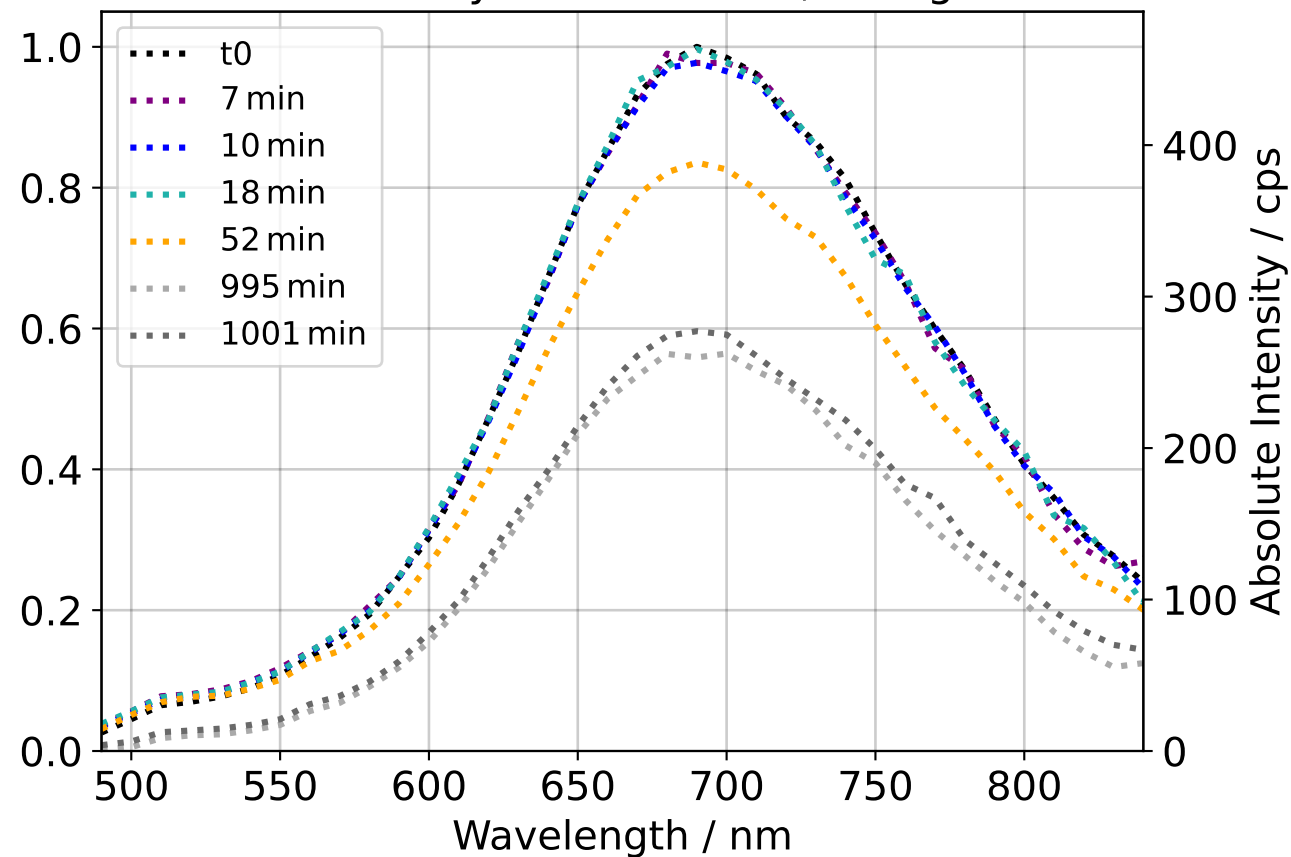

Supplement: d4re00548a1.zip [file d4re00548a1.zip]

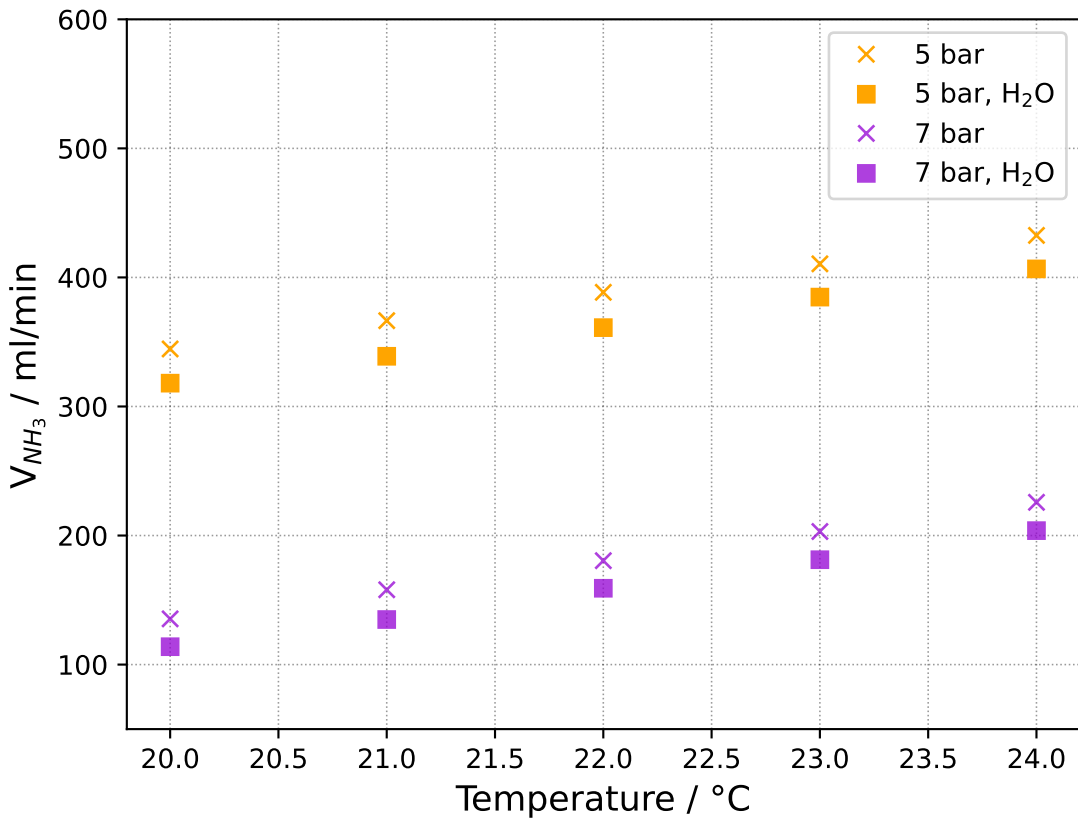

Supplement: d4re00548a1.zip [file d4re00548a1.zip]

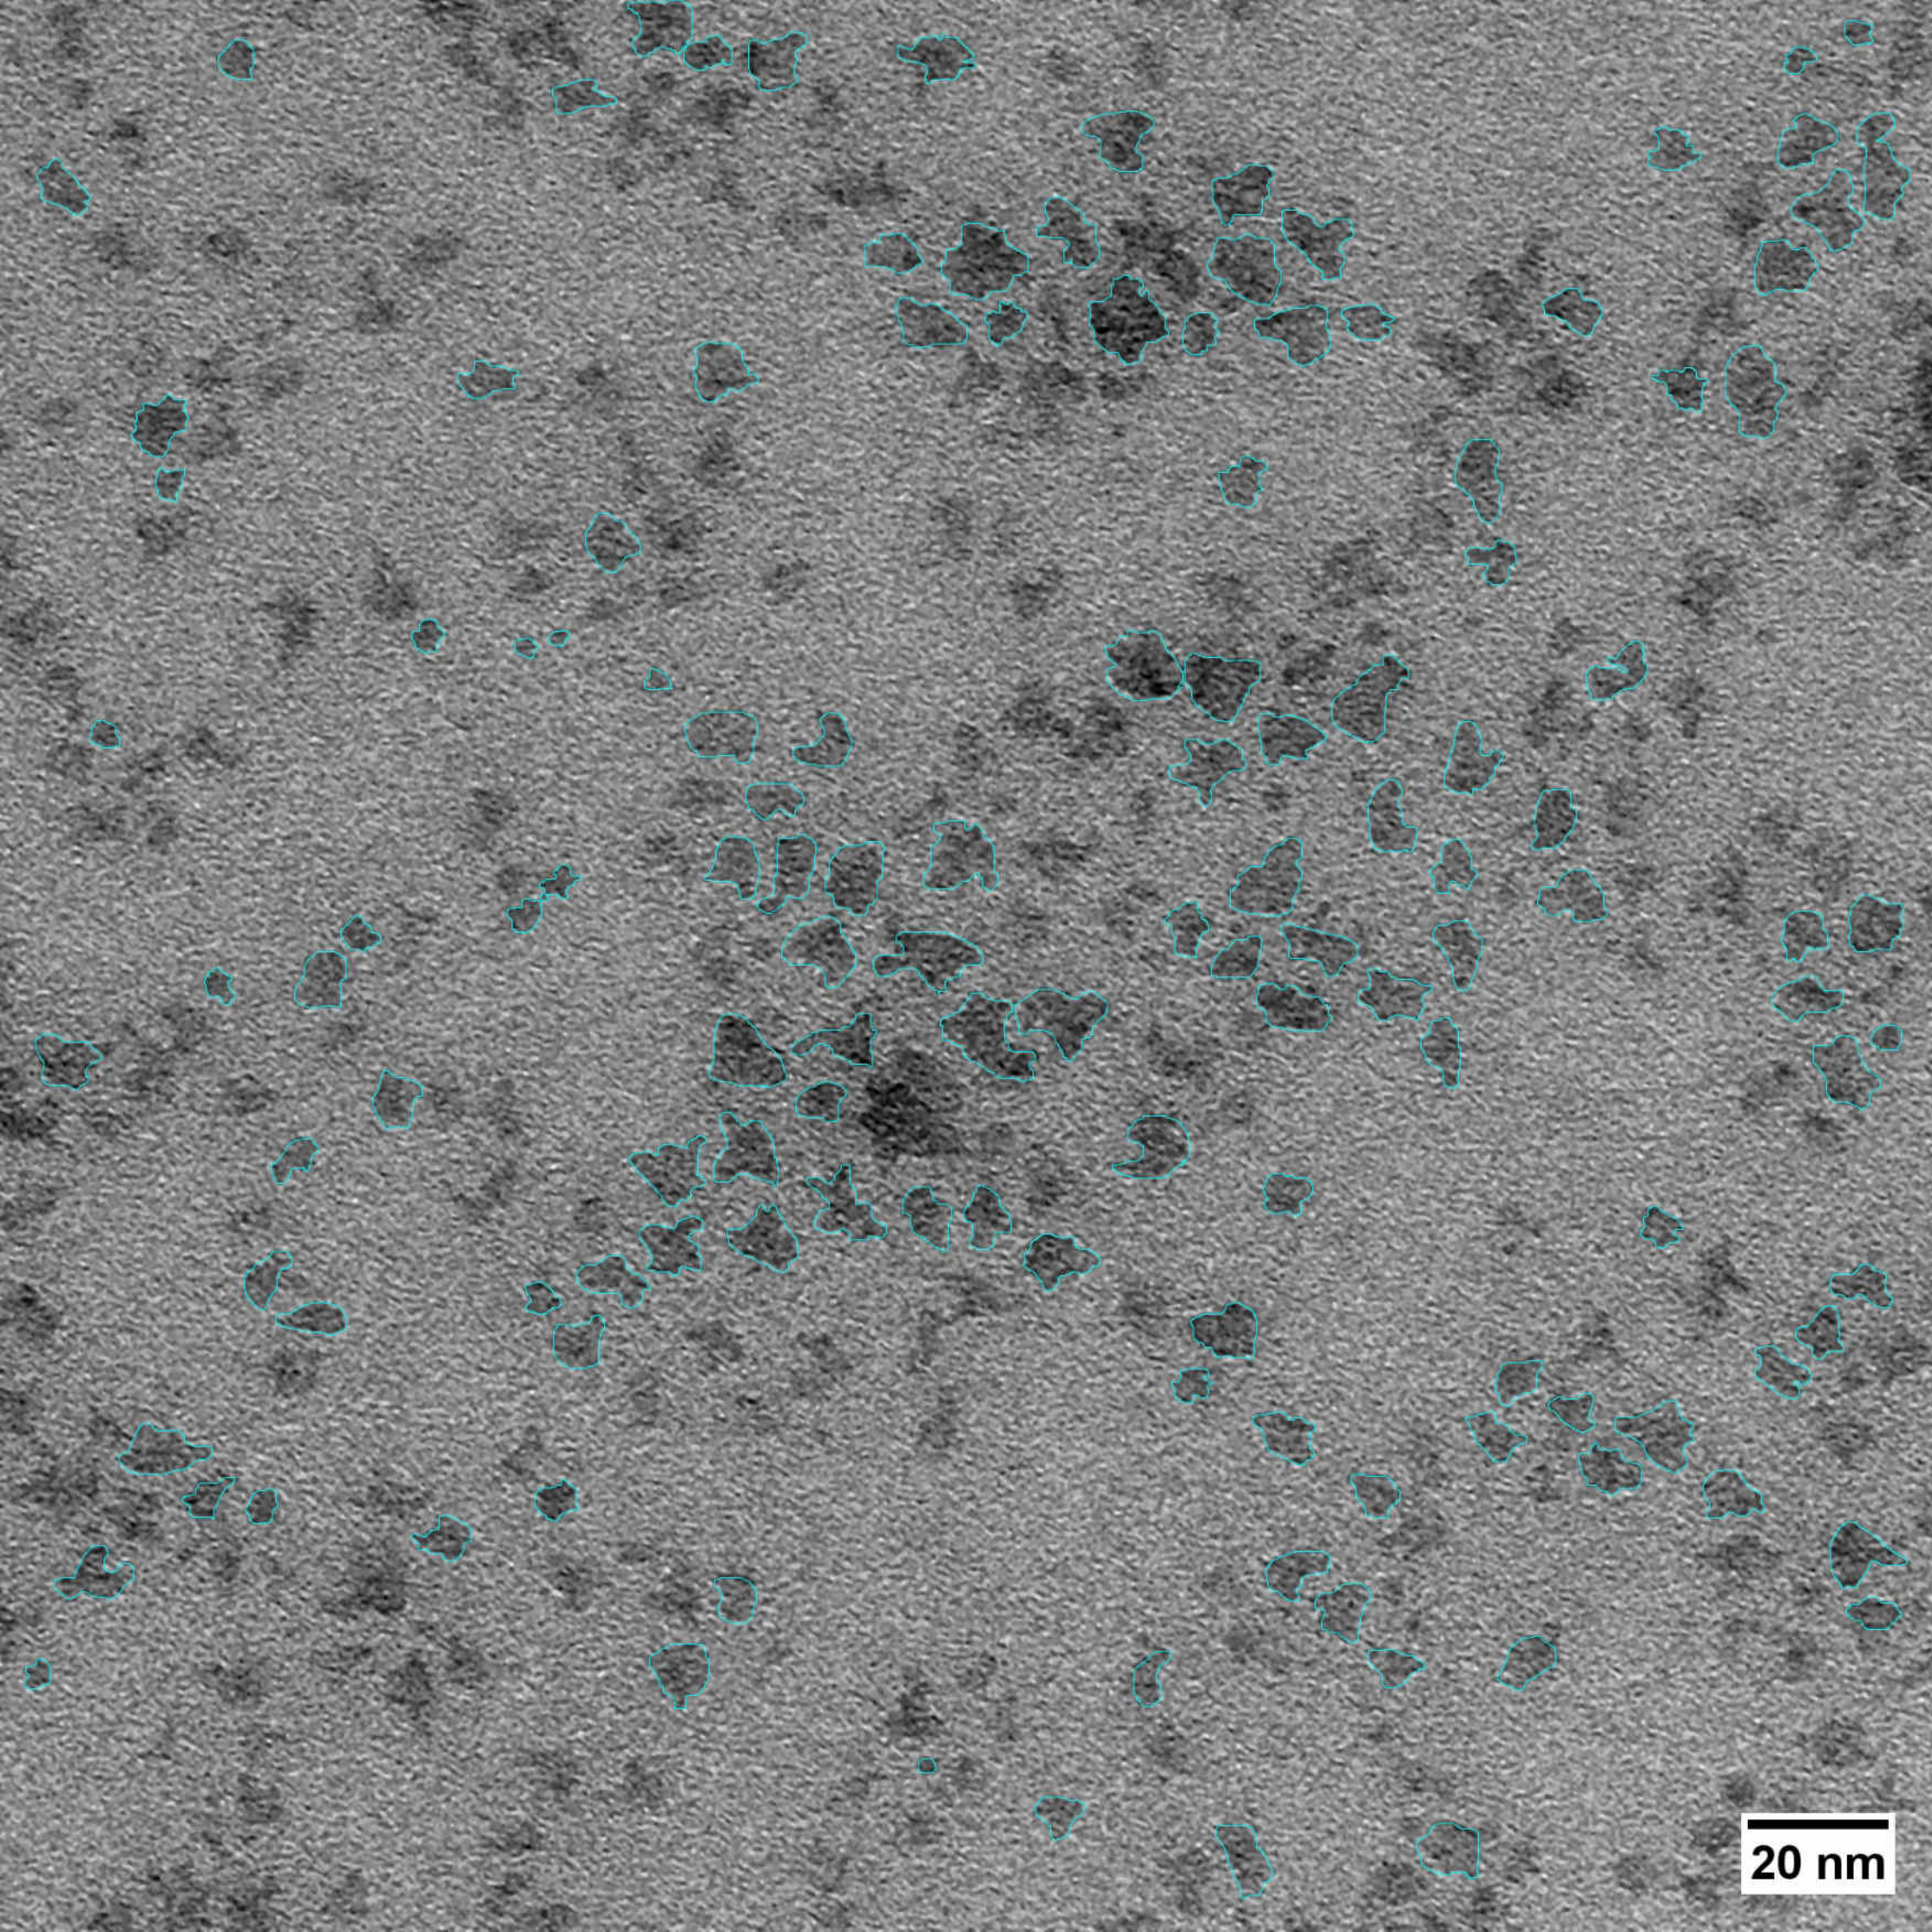

20 nm

Supplement: d4re00548a1.zip [file d4re00548a1.zip]

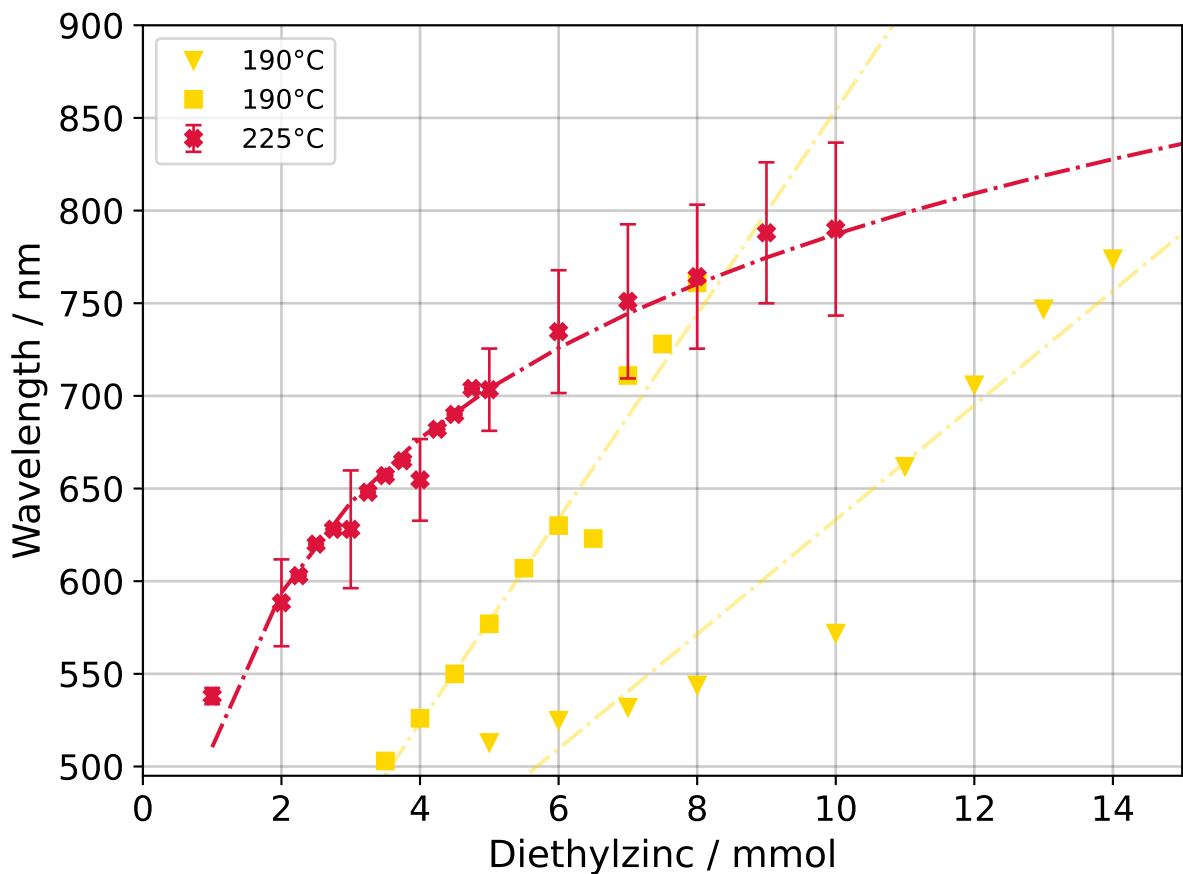

Supplement: d4re00548a1.zip [file d4re00548a1.zip]

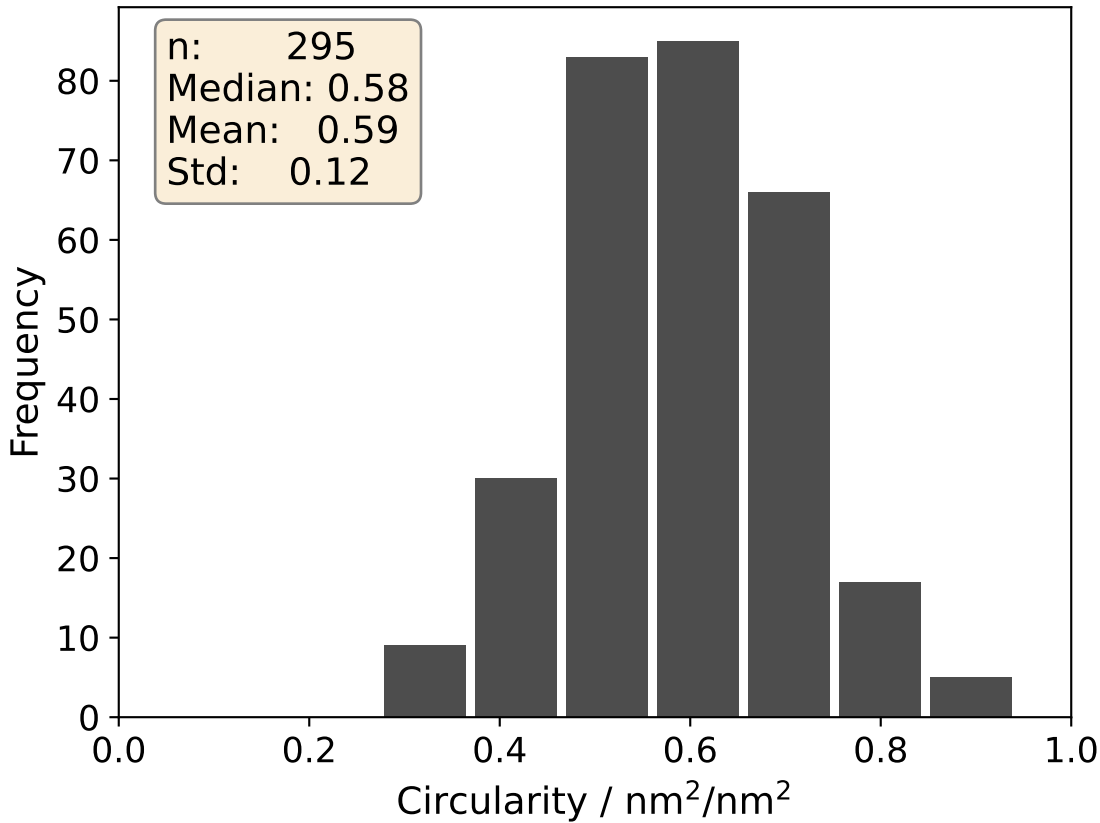

Supplement: d4re00548a1.zip [file d4re00548a1.zip]

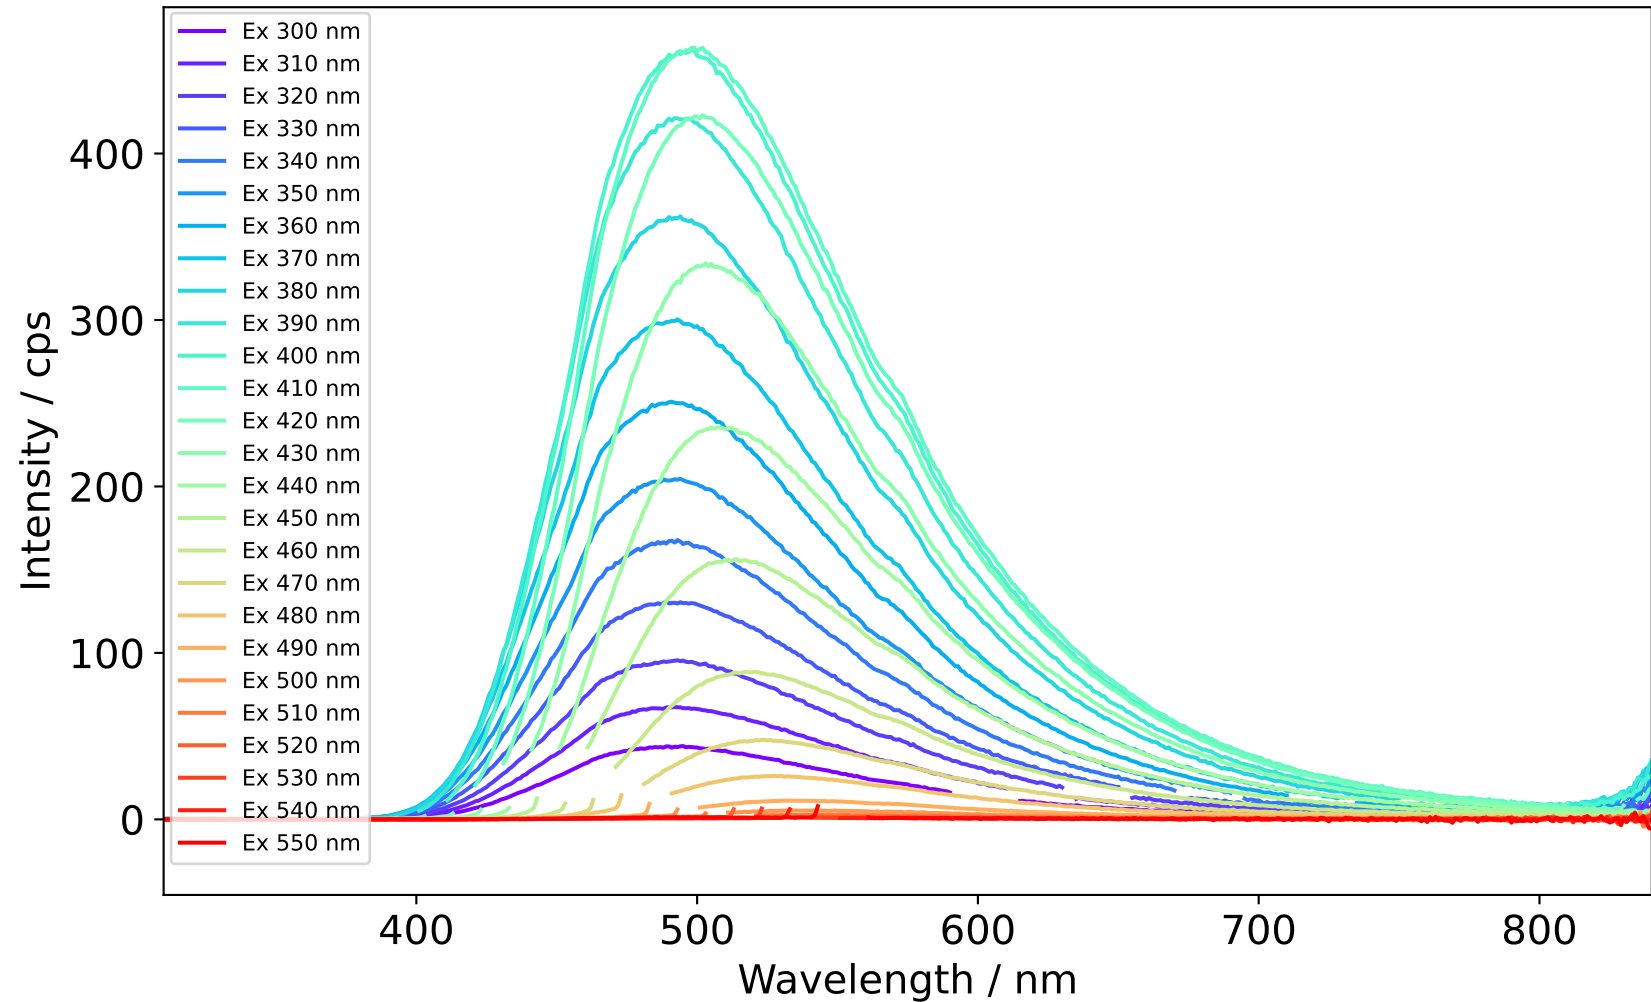

Supplement: d4re00548a1.zip [file d4re00548a1.zip]

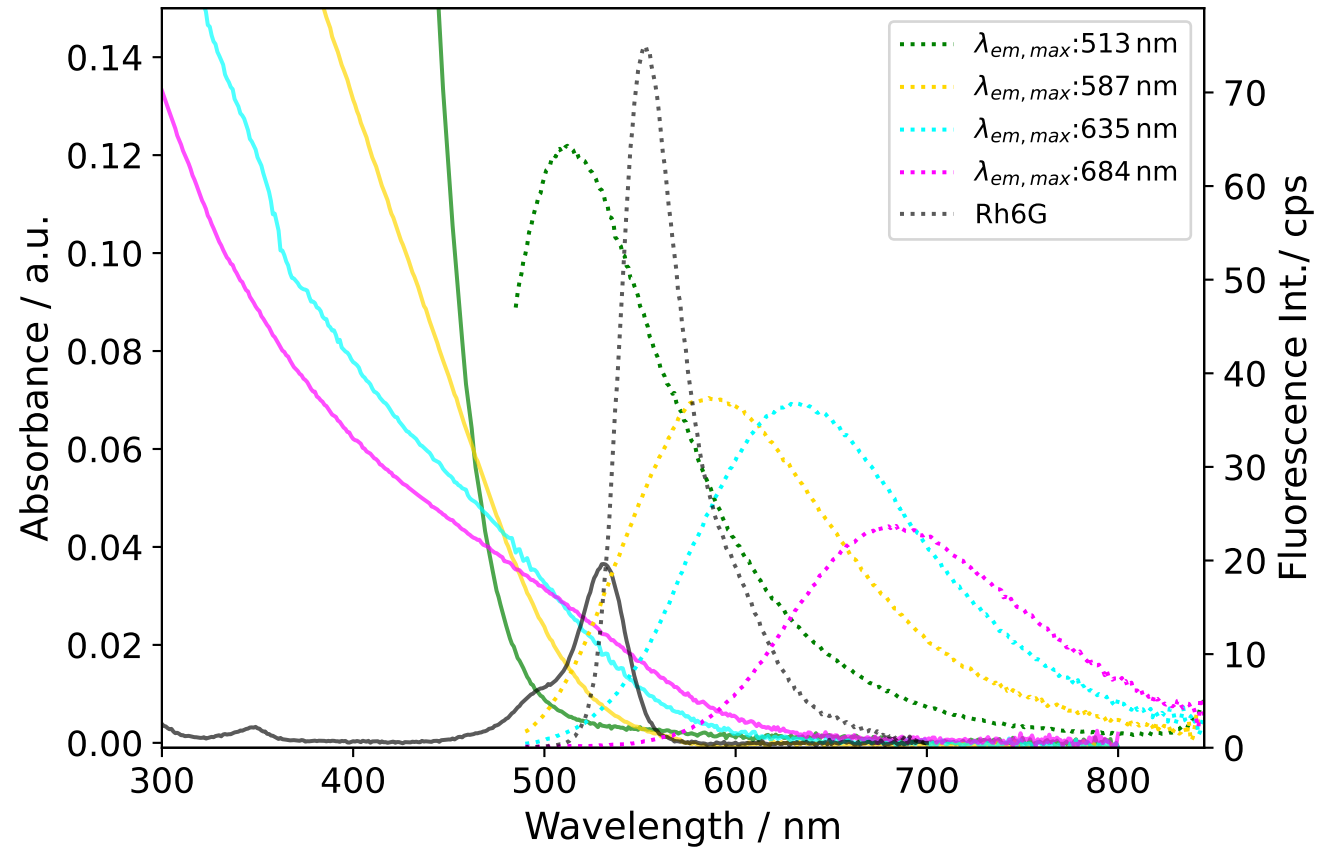

Supplement: d4re00548a1.zip [file d4re00548a1.zip]
